# Supplementary material
Source: PubMed Central journal article supplement (PMC7483974)
Supplement: NIHMS1600851-supplement-1.pdf [file NIHMS1600851-supplement-1.pdf]

Table S1: Information for the 41 chemicals included in the model evaluation and PMIDs for the source of metabolism and concentration-time data

| Chemical                              | DTXSID        | CASRN    | CAMEO Chemical Class     | Molecular Weight (g/mol) | Log P | Solubility (mol/L) | Blood Air Partition Coefficient | Available Species Data | Vmax (μmol/h/kg BW) | K <sub>M</sub> (μM) | Metabolism Data Source (PMID)                          |
|---------------------------------------|---------------|----------|--------------------------|--------------------------|-------|--------------------|---------------------------------|------------------------|---------------------|---------------------|--------------------------------------------------------|
| 1,1-Dichloroethylene                  | DTXSID8021438 | 75-35-4  | HOC                      | 96.94                    | 2.16  | 4.07E-02           | 16.63 <sup>a</sup>              | Rat                    | 117.27              | 1.03                | <a href="#">20685286</a>                               |
| 1,1,1-Trichloroethane                 | DTXSID0021381 | 71-55-6  | HOC                      | 133.40                   | 2.43  | 1.39E-02           | 12.19 <sup>a</sup>              | Human                  | 0.88                | 43.10               | <a href="#">20685286</a>                               |
| 1,1,1,2-Tetrafluoroethane             | DTXSID1021324 | 811-97-2 | FOC                      | 102.03                   | 0.83  | 1.23E-03           | 0.61 <sup>a</sup>               | Human                  | 0.08                | 4.90                | <a href="#">17365028</a>                               |
| 1,1,2-Trichloro-1,2,2-trifluoroethane | DTXSID6021377 | 76-13-1  | FOC                      | 187.37                   | 2.97  | 1.01E-03           | 2.20 <sup>a</sup>               | Human                  | 0.23                | 5.34                | <a href="#">17365028</a>                               |
| 1,2-Dichloroethane                    | DTXSID6020438 | 107-06-2 | HOC                      | 98.95                    | 1.63  | 6.89E-02           | 25.11 <sup>a</sup>              | Rat                    | 49.63               | 2.53                | <a href="#">20685286</a>                               |
| 1,2-Dichloropropane                   | DTXSID0020448 | 78-87-5  | HOC                      | 112.98                   | 1.99  | 1.86E-02           | 36.35 <sup>a</sup>              | Rat                    | 77.22               | 5.11                | <a href="#">14709629</a> ,<br><a href="#">25072765</a> |
| 1,2,4-Trimethylbenzene                | DTXSID6021402 | 95-63-6  | ArH                      | 120.20                   | 3.62  | 5.05E-04           | 92.56 <sup>a</sup>              | Human                  | 20.57               | 13.00               | <a href="#">10079206</a>                               |
| 1,3-Butadiene                         | DTXSID3020203 | 106-99-0 | Other (Conjugated diene) | 54.09                    | 1.92  | 1.80E-02           | 0.82 <sup>a</sup>               | Human Rat              | 1582.09 <br>2462.40 | 390.00 <br>390.00   | <a href="#">20122977</a>                               |
| 1,4-Dioxane                           | DTXSID4020533 | 123-91-1 | Ether                    | 88.11                    | -0.16 | 1.12E+01           | 1110.51 <sup>a</sup>            | Human                  | 20.15               | 34.05               | <a href="#">20685286</a>                               |
| 2-Butoxyethanol                       | DTXSID1024097 | 111-76-2 | Alcohol                  | 118.18                   | 0.66  | 4.66E+00           | 2.69E+04                        | Human                  | 145.98              | 200.00              | <a href="#">21998005</a>                               |
| 2,2-Dichloro-1,1,1-trifluoroethane    | DTXSID7020712 | 306-83-2 | FOC                      | 152.93                   | 2.38  | 1.32E-02           | 2.61 <sup>a</sup>               | Rat                    | 57.15               | 6.54                | <a href="#">8516773</a>                                |
| 2H-Perfluoropropane                   | DTXSID4042048 | 431-89-0 | FOC                      | 170.03                   | 1.85  | 3.16E-04           | 0.81 <sup>a</sup>               | Human                  | 0.00                | 0.00                | <a href="#">17365028</a>                               |
| Acrylonitrile                         | DTXSID5020029 | 107-13-1 | Other (Nitrile)          | 53.06                    | 0.13  | 1.84E+00           | 386.88 <sup>a</sup>             | Rat                    | 445.60              | 15.08               | <a href="#">20685286</a>                               |
| Benzene                               | DTXSID3039242 | 71-43-2  | ArH                      | 78.11                    | 2.25  | 1.02E-02           | 22.51 <sup>a</sup>              | Human Rat              | 2.54  13.78         | 4.48  4.48          | <a href="#">20685286</a>                               |
| Bromotrifluoromethane                 | DTXSID5026415 | 75-63-8  | FOC                      | 148.91                   | 1.85  | 2.16E-03           | 0.11 <sup>a</sup>               | Human                  | 0.00                | 0.00                | <a href="#">17365028</a>                               |
| Carbon tetrachloride                  | DTXSID8020250 | 56-23-5  | HOC                      | 153.81                   | 2.73  | 8.19E-03           | 3.75 <sup>a</sup>               | Rat                    | 6.41                | 1.63                | <a href="#">20685286</a>                               |
| Chlorobenzene                         | DTXSID4020298 | 108-90-7 | Other (Aryl halide)      | 112.56                   | 2.83  | 3.46E-03           | 68.70 <sup>a</sup>              | Human                  | 53.04               | 0.36                | <a href="#">15129550</a>                               |
| Chloroform                            | DTXSID1020306 | 67-66-3  | HOC                      | 119.37                   | 1.96  | 4.85E-02           | 24.10 <sup>a</sup>              | Rat                    | 161.26              | 3.77                | <a href="#">20685286</a>                               |
| Decane                                | DTXSID6024913 | 124-18-5 | AlH                      | 142.29                   | 5.24  | 4.95E-07           | 146.15 <sup>a</sup>             | Rat                    | 7.51                | 10.54               | <a href="#">17365028</a>                               |
| Dichlorodifluoromethane               | DTXSID6020436 | 75-71-8  | FOC                      | 120.91                   | 2.10  | 3.49E-03           | 0.13 <sup>a</sup>               | Human                  | 0.35                | 8.27                | <a href="#">17365028</a>                               |
| Dichloromethane                       | DTXSID0020868 | 75-09-2  | HOC                      | 84.93                    | 1.43  | 1.22E-01           | 8.46 <sup>a</sup>               | Human                  | 20.57               | 8.83                | <a href="#">20685286</a>                               |
| Ethanol                               | DTXSID9020584 | 64-17-5  | Alcohol                  | 46.07                    | -0.28 | 1.65E+01           | 4521.67                         | Human                  | 3392.40             | 1000.00             | <a href="#">21998005</a>                               |
| Ethyl T-butyl ether                   | DTXSID0025604 | 637-92-3 | Ether                    | 102.18                   | 1.52  | 5.28E-02           | 23.26                           | Human                  | 25.70               | 50.00               | <a href="#">21998005</a>                               |
| Ethylbenzene                          | DTXSID3020596 | 100-41-4 | ArH                      | 106.17                   | 3.18  | 1.64E-03           | 42.64 <sup>a</sup>              | Human Rat              | 16.83  91.23        | 9.80  9.80          | <a href="#">20685286</a>                               |
| Furan                                 | DTXSID6020646 | 110-00-9 | Ether                    | 68.08                    | 1.29  | 2.54E-01           | 276.57 <sup>a</sup>             | Rat                    | 5.12                | 2.64                | <a href="#">20685286</a>                               |
| Isopropanol                           | DTXSID7020762 | 67-63-0  | Alcohol                  | 60.10                    | 0.26  | 9.46E+00           | 3452.92 <sup>a</sup>            | Human Rat              | 778.04 <br>4218.42  | 4160.01 <br>4160.01 | <a href="#">17365028</a>                               |

|                                |               |           |                          |        |       |          |                      |           |                  |                 |                          |
|--------------------------------|---------------|-----------|--------------------------|--------|-------|----------|----------------------|-----------|------------------|-----------------|--------------------------|
| <b>Methanol</b>                | DTXSID2021731 | 67-56-1   | Alcohol                  | 32.04  | -0.61 | 2.61E+01 | 4877.47 <sup>a</sup> | Rat       | 689.63           | 1058.61         | <a href="#">1440610</a>  |
| <b>Methyl ethyl ketone</b>     | DTXSID3021516 | 78-93-3   | Other (Ketones)          | 72.11  | 0.44  | 2.13E+00 | 405.97 <sup>a</sup>  | Human     | 75.44            | 8.74            | <a href="#">12133235</a> |
| <b>Methyl tert-butyl ether</b> | DTXSID3020833 | 1634-04-4 | Ether                    | 88.15  | 1.09  | 3.76E-01 | 28.42 <sup>a</sup>   | Human     | 3.93             | 4.99            | <a href="#">20685286</a> |
| <b>n-Hexane</b>                | DTXSID0021917 | 110-54-3  | AlH                      | 86.18  | 3.94  | 1.52E-04 | 2.49 <sup>a</sup>    | Rat       | 3.93             | 4.64            | <a href="#">20685286</a> |
| <b>N-Methyl-2-pyrrolidone</b>  | DTXSID6020856 | 872-50-4  | Other<br>(Amides/Imides) | 99.13  | -0.30 | 9.95E+00 | 2.74E+06             | Human     | 23.74            | 2400.00         | <a href="#">21998005</a> |
| <b>Nonane</b>                  | DTXSID9025796 | 111-84-2  | AlH                      | 128.26 | 5.44  | 1.93E-06 | 211.67               | Rat       | 84.81            | 6.93            | <a href="#">21391144</a> |
| <b>Octane</b>                  | DTXSID0026882 | 111-65-9  | AlH                      | 114.23 | 5.05  | 9.23E-06 | 39.83                | Rat       | 4.63             | 10.42           | <a href="#">21391144</a> |
| <b>Pyrene</b>                  | DTXSID3024289 | 129-00-0  | ArH                      | 202.26 | 5.12  | 6.59E-07 | 1.58E+06             | Rat       | 6.19             | 4.50            | <a href="#">21998005</a> |
| <b>Styrene</b>                 | DTXSID2021284 | 100-42-5  | ArH                      | 104.15 | 2.92  | 1.88E-03 | 82.51 <sup>a</sup>   | Human Rat | 25.23 <br>136.80 | 3.46 <br>3.46   | <a href="#">20685286</a> |
| <b>tert-Amyl methyl ether</b>  | DTXSID8024521 | 994-05-8  | Ether                    | 102.18 | 1.74  | 8.57E-02 | 26.74 <sup>a</sup>   | Human     | 1800.00          | 1000.00         | <a href="#">10367338</a> |
| <b>Tetrachloroethylene</b>     | DTXSID2021319 | 127-18-4  | HOC                      | 165.82 | 3.35  | 2.33E-03 | 21.42 <sup>a</sup>   | Human Rat | 0.70 <br>3.80    | 75.38 <br>75.38 | <a href="#">20685286</a> |
| <b>Tetrahydrofuran</b>         | DTXSID1021328 | 109-99-9  | Ether                    | 72.11  | 0.60  | 2.96E+00 | 246.24 <sup>a</sup>  | Human     | 232618.59        | 138.68          | <a href="#">20685286</a> |
| <b>Toluene</b>                 | DTXSID7021360 | 108-88-3  | ArH                      | 92.14  | 2.62  | 4.61E-03 | 26.26 <sup>a</sup>   | Rat       | 97.05            | 5.97            | <a href="#">20685286</a> |
| <b>Trichloroethylene</b>       | DTXSID0021383 | 79-01-6   | HOC                      | 131.38 | 2.29  | 1.13E-02 | 22.24 <sup>a</sup>   | Human Rat | 21.28 <br>115.37 | 11.42 <br>11.42 | <a href="#">20685286</a> |
| <b>Vinyl chloride</b>          | DTXSID8021434 | 75-01-4   | HOC                      | 62.50  | 1.00  | 0.081502 | 2.89                 | Human     | 39.99            | 1.60            | <a href="#">21391144</a> |

<sup>a</sup>Literature Blood:Air Partition Coefficient value available from Metabolism Data Source; CASRN, Chemical Abstracts Service Registry Number; DTXSID, DSSTox Substance Identifier, used in the EPA CompTox Dashboard; CAMEO, Computer-Aided Management of Emergency Operations, database of hazardous chemical datasheets that emergency responders and planners can use to get response recommendations and predict hazards; PMID, unique PubMed article ID number (for use on <https://www.ncbi.nlm.nih.gov/pubmed/>); HOC, halogenated organic compound; FOC, fluorinated organic compound; ArH, aromatic hydrocarbon; AlH, aliphatic hydrocarbon.

Table S2: List of all exposure scenarios included in the model evaluation

| <b>Chemical</b>                       | <b>Species</b> | <b>Matrix</b> | <b>Dose (ppm)</b> | <b>Exposure Length (hours)</b> | <b>Number of Data Points in Study</b> | <b>Source (PMID)</b>     |
|---------------------------------------|----------------|---------------|-------------------|--------------------------------|---------------------------------------|--------------------------|
| 1,1-Dichloroethylene                  | Rat            | EB            | 25                | 3                              | 33                                    | <a href="#">6845373</a>  |
| 1,1-Dichloroethylene                  | Rat            | EB            | 75                | 3                              | 32                                    | <a href="#">6845373</a>  |
| 1,1-Dichloroethylene                  | Rat            | EB            | 150               | 3                              | 34                                    | <a href="#">6845373</a>  |
| 1,1-Dichloroethylene                  | Rat            | EB            | 300               | 3                              | 36                                    | <a href="#">6845373</a>  |
| 1,1-Dichloroethylene                  | Rat            | VBL           | 25                | 3                              | 24                                    | <a href="#">6845373</a>  |
| 1,1-Dichloroethylene                  | Rat            | VBL           | 75                | 3                              | 24                                    | <a href="#">6845373</a>  |
| 1,1-Dichloroethylene                  | Rat            | VBL           | 150               | 3                              | 24                                    | <a href="#">6845373</a>  |
| 1,1-Dichloroethylene                  | Rat            | VBL           | 300               | 3                              | 24                                    | <a href="#">6845373</a>  |
| 1,1,1-Trichloroethane                 | Human          | EB            | 70                | 4                              | 10                                    | <a href="#">422270</a>   |
| 1,1,1-Trichloroethane                 | Human          | EB            | 145               | 4                              | 10                                    | <a href="#">422270</a>   |
| 1,1,1-Trichloroethane                 | Human          | BL            | 70                | 4                              | 5                                     | <a href="#">422270</a>   |
| 1,1,1-Trichloroethane                 | Human          | BL            | 145               | 4                              | 5                                     | <a href="#">422270</a>   |
| 1,1,1-Trichloroethane                 | Human          | BL (+W)       | 142               | 4                              | 5                                     | <a href="#">422270</a>   |
| 1,1,1-Trichloroethane                 | Human          | EB (+W)       | 142               | 4                              | 9                                     | <a href="#">422270</a>   |
| 1,1,1,2-Tetrafluoroethane             | Human          | VBL           | 1000              | 1                              | 17                                    | <a href="#">17365028</a> |
| 1,1,1,2-Tetrafluoroethane             | Human          | VBL           | 2000              | 1                              | 21                                    | <a href="#">17365028</a> |
| 1,1,1,2-Tetrafluoroethane             | Human          | VBL           | 4000              | 1                              | 22                                    | <a href="#">17365028</a> |
| 1,1,1,2-Tetrafluoroethane             | Human          | VBL           | 8000              | 1                              | 19                                    | <a href="#">17365028</a> |
| 1,1,2-Trichloro-1,2,2-trifluoroethane | Human          | VBL           | 250               | 4                              | 14                                    | <a href="#">17365028</a> |
| 1,2-Dichloroethane                    | Rat            | BL            | 50                | 6                              | 11                                    | <a href="#">18579268</a> |
| 1,2-Dichloroethane                    | Rat            | BL            | 150               | 6                              | 12                                    | <a href="#">18579268</a> |
| 1,2-Dichloroethane                    | Rat            | BL            | 200               | 6                              | 6                                     | <a href="#">18579268</a> |
| 1,2-Dichloroethane                    | Rat            | BL            | 250               | 6                              | 15                                    | <a href="#">18579268</a> |
| 1,2-Dichloropropane                   | Rat            | BL            | 5                 | 6                              | 14                                    | <a href="#">1897000</a>  |
| 1,2-Dichloropropane                   | Rat            | BL            | 50                | 6                              | 15                                    | <a href="#">1897000</a>  |
| 1,2-Dichloropropane                   | Rat            | BL            | 100               | 6                              | 13                                    | <a href="#">1897000</a>  |
| 1,2,4-Trimethylbenzene                | Human          | EB            | 2                 | 2                              | 2                                     | <a href="#">10079206</a> |
| 1,2,4-Trimethylbenzene                | Human          | EB            | 25                | 2                              | 5                                     | <a href="#">10079206</a> |

|                                    |       |     |       |    |    |                          |
|------------------------------------|-------|-----|-------|----|----|--------------------------|
| 1,2,4-Trimethylbenzene             | Human | ABL | 2     | 2  | 17 | <a href="#">10079206</a> |
| 1,2,4-Trimethylbenzene             | Human | ABL | 25    | 2  | 22 | <a href="#">10079206</a> |
| 1,3-Butadiene                      | Rat   | BL  | 63    | 6  | 9  | <a href="#">26079054</a> |
| 1,3-Butadiene                      | Rat   | BL  | 616   | 6  | 8  | <a href="#">26079054</a> |
| 1,3-Butadiene                      | Rat   | BL  | 1249  | 6  | 9  | <a href="#">26079054</a> |
| 1,3-Butadiene                      | Human | EB  | 5     | 2  | 35 | <a href="#">26079054</a> |
| 1,4-Dioxane                        | Human | PL  | 50    | 6  | 13 | <a href="#">926203</a>   |
| 2-Butoxyethanol                    | Human | BL  | 20    | 2  | 17 | <a href="#">9878592</a>  |
| 2,2-Dichloro-1,1,1-trifluoroethane | Rat   | VBL | 1000  | 4  | 11 | <a href="#">17365028</a> |
| 2,2-Dichloro-1,1,1-trifluoroethane | Rat   | VBL | 10000 | 4  | 13 | <a href="#">17365028</a> |
| 2H-Perfluoropropane                | Human | VBL | 1000  | 1  | 20 | <a href="#">17365028</a> |
| 2H-Perfluoropropane                | Human | VBL | 2000  | 1  | 22 | <a href="#">17365028</a> |
| 2H-Perfluoropropane                | Human | VBL | 4000  | 1  | 21 | <a href="#">17365028</a> |
| 2H-Perfluoropropane                | Human | VBL | 8000  | 1  | 23 | <a href="#">17365028</a> |
| Acrylonitrile                      | Rat   | BL  | 186   | 3  | 4  | <a href="#">8887460</a>  |
| Acrylonitrile                      | Rat   | BL  | 254   | 3  | 4  | <a href="#">8887460</a>  |
| Acrylonitrile                      | Rat   | BL  | 291   | 3  | 4  | <a href="#">8887460</a>  |
| Benzene                            | Rat   | BL  | 1000  | 2  | 28 | <a href="#">1103957</a>  |
| Benzene                            | Human | EB  | 1.57  | 4  | 24 | <a href="#">1439659</a>  |
| Benzene                            | Human | EB  | 9.39  | 4  | 33 | <a href="#">1439659</a>  |
| Benzene                            | Human | EB  | 25    | 2  | 24 | <a href="#">1103957</a>  |
| Benzene                            | Human | VBL | 1.57  | 4  | 38 | <a href="#">1439659</a>  |
| Benzene                            | Human | VBL | 9.39  | 4  | 41 | <a href="#">1439659</a>  |
| Benzene                            | Human | BL  | 25    | 2  | 20 | <a href="#">1103957</a>  |
| Bromotrifluoromethane              | Human | VBL | 10000 | 24 | 60 | <a href="#">17365028</a> |
| Carbon tetrachloride               | Rat   | ABL | 100   | 2  | 24 | <a href="#">17365028</a> |
| Carbon tetrachloride               | Rat   | ABL | 1000  | 2  | 28 | <a href="#">17365028</a> |
| Chlorobenzene                      | Human | BL  | 10    | 8  | 27 | <a href="#">11100949</a> |
| Chloroform                         | Rat   | BL  | 100   | 6  | 7  | <a href="#">23143927</a> |
| Decane                             | Rat   | BL  | 1200  | 4  | 15 | <a href="#">16036747</a> |
| Dichlorodifluoromethane            | Human | VBL | 1000  | 1  | 31 | <a href="#">17365028</a> |
| Dichlorodifluoromethane            | Human | VBL | 4000  | 1  | 39 | <a href="#">17365028</a> |

|                         |       |     |      |     |    |                          |
|-------------------------|-------|-----|------|-----|----|--------------------------|
| Dichloromethane         | Human | EB  | 100  | 6   | 21 | <a href="#">1900959</a>  |
| Dichloromethane         | Human | EB  | 350  | 6   | 21 | <a href="#">1900959</a>  |
| Dichloromethane         | Human | VBL | 100  | 6   | 7  | <a href="#">1900959</a>  |
| Dichloromethane         | Human | VBL | 350  | 6   | 7  | <a href="#">1900959</a>  |
| Ethanol                 | Human | BL  | 125  | 4   | 6  | <a href="#">24495244</a> |
| Ethanol                 | Human | BL  | 250  | 4   | 6  | <a href="#">24495244</a> |
| Ethanol                 | Human | BL  | 450  | 4   | 6  | <a href="#">24495244</a> |
| Ethanol                 | Human | BL  | 750  | 4   | 6  | <a href="#">24495244</a> |
| Ethanol                 | Human | BL  | 1000 | 4   | 6  | <a href="#">24495244</a> |
| Ethyl T-butyl ether     | Human | BL  | 4.5  | 4   | 3  | <a href="#">11504147</a> |
| Ethyl T-butyl ether     | Human | BL  | 40.6 | 4   | 8  | <a href="#">11504147</a> |
| Ethylbenzene            | Rat   | VBL | 50   | 4   | 5  | <a href="#">15777087</a> |
| Ethylbenzene            | Human | VBL | 33   | 7   | 4  | <a href="#">15777087</a> |
| Furan                   | Rat   | BL  | 52   | 4   | 3  | <a href="#">8248934</a>  |
| Furan                   | Rat   | BL  | 107  | 4   | 3  | <a href="#">8248934</a>  |
| Furan                   | Rat   | BL  | 208  | 4   | 3  | <a href="#">8248934</a>  |
| Isopropanol             | Rat   | VBL | 476  | 6   | 10 | <a href="#">17365028</a> |
| Isopropanol             | Rat   | VBL | 4960 | 6   | 11 | <a href="#">17365028</a> |
| Isopropanol             | Human | EEB | 100  | 0.2 | 45 | <a href="#">11568359</a> |
| Isopropanol             | Human | MEB | 100  | 0.2 | 10 | <a href="#">11568359</a> |
| Methanol                | Rat   | BL  | 200  | 6   | 9  | <a href="#">1440610</a>  |
| Methanol                | Rat   | BL  | 1200 | 6   | 9  | <a href="#">1440610</a>  |
| Methanol                | Rat   | BL  | 2000 | 6   | 9  | <a href="#">1440610</a>  |
| Methyl ethyl ketone     | Human | VBL | 25   | 4   | 27 | <a href="#">2309238</a>  |
| Methyl ethyl ketone     | Human | VBL | 200  | 4   | 27 | <a href="#">2309238</a>  |
| Methyl ethyl ketone     | Human | VBL | 400  | 4   | 30 | <a href="#">2309238</a>  |
| Methyl tert-butyl ether | Human | BL  | 4.5  | 4   | 5  | <a href="#">11504147</a> |
| Methyl tert-butyl ether | Human | BL  | 25   | 4   | 11 | <a href="#">17668360</a> |
| Methyl tert-butyl ether | Human | BL  | 38.7 | 4   | 7  | <a href="#">11504147</a> |
| Methyl tert-butyl ether | Human | BL  | 75   | 4   | 10 | <a href="#">17668360</a> |
| n-Hexane                | Rat   | BL  | 3000 | 6   | 13 | <a href="#">15793558</a> |
| N-Methyl-2-pyrrolidone  | Human | BL  | 2.47 | 8   | 7  | <a href="#">19875680</a> |

|                        |       |    |       |     |    |                                    |
|------------------------|-------|----|-------|-----|----|------------------------------------|
| N-Methyl-2-pyrrolidone | Human | BL | 5.92  | 8   | 7  | <a href="#">19875680</a>           |
| N-Methyl-2-pyrrolidone | Human | BL | 13.07 | 8   | 7  | <a href="#">19875680</a>           |
| N-Methyl-2-pyrrolidone | Human | PL | 2.47  | 6.2 | 6  | <a href="#">19875680</a>           |
| N-Methyl-2-pyrrolidone | Human | PL | 9.87  | 6.2 | 6  | <a href="#">19875680</a>           |
| N-Methyl-2-pyrrolidone | Human | PL | 19.73 | 6.2 | 6  | <a href="#">19875680</a>           |
| Nonane                 | Rat   | BL | 100   | 4   | 13 | <a href="#">Source<sup>a</sup></a> |
| Nonane                 | Rat   | BL | 500   | 4   | 13 | <a href="#">Source<sup>a</sup></a> |
| Nonane                 | Rat   | BL | 1000  | 4   | 13 | <a href="#">Source<sup>a</sup></a> |
| Octane                 | Rat   | BL | 1000  | 2   | 4  | <a href="#">22188408</a>           |
| Octane                 | Rat   | BL | 5000  | 2   | 1  | <a href="#">22188408</a>           |
| Pyrene                 | Rat   | BL | 24.18 | 1.6 | 14 | <a href="#">8078087</a>            |
| Pyrene                 | Rat   | BL | 60.44 | 1.6 | 15 | <a href="#">8078087</a>            |
| Pyrene                 | Rat   | BL | 96.71 | 1.6 | 15 | <a href="#">8078087</a>            |
| Styrene                | Rat   | BL | 80    | 6   | 12 | <a href="#">734422</a>             |
| Styrene                | Rat   | BL | 80    | 24  | 8  | <a href="#">734422</a>             |
| Styrene                | Rat   | BL | 200   | 6   | 13 | <a href="#">734422</a>             |
| Styrene                | Rat   | BL | 200   | 24  | 8  | <a href="#">734422</a>             |
| Styrene                | Rat   | BL | 600   | 6   | 13 | <a href="#">734422</a>             |
| Styrene                | Rat   | BL | 600   | 24  | 8  | <a href="#">734422</a>             |
| Styrene                | Rat   | BL | 1200  | 6   | 12 | <a href="#">734422</a>             |
| Styrene                | Rat   | BL | 1200  | 24  | 9  | <a href="#">734422</a>             |
| Styrene                | Human | EB | 80    | 6   | 11 | <a href="#">7385239</a>            |
| Styrene                | Human | BL | 80    | 6   | 30 | <a href="#">734422</a>             |
| tert-Amyl methyl ether | Human | BL | 3.8   | 4   | 6  | <a href="#">11504147</a>           |
| tert-Amyl methyl ether | Human | BL | 15    | 4   | 10 | <a href="#">17668360</a>           |
| tert-Amyl methyl ether | Human | BL | 38.4  | 4   | 7  | <a href="#">11504147</a>           |
| tert-Amyl methyl ether | Human | BL | 50    | 4   | 9  | <a href="#">17668360</a>           |
| Tetrachloroethylene    | Rat   | BL | 600   | 6   | 10 | <a href="#">538758</a>             |
| Tetrachloroethylene    | Human | EB | 72    | 4   | 10 | <a href="#">422271</a>             |
| Tetrachloroethylene    | Human | EB | 144   | 4   | 8  | <a href="#">422271</a>             |
| Tetrachloroethylene    | Human | BL | 72    | 4   | 8  | <a href="#">422271</a>             |
| Tetrachloroethylene    | Human | BL | 144   | 4   | 8  | <a href="#">422271</a>             |

|                     |       |         |       |     |    |                          |
|---------------------|-------|---------|-------|-----|----|--------------------------|
| Tetrachloroethylene | Human | BL (+W) | 142   | 4   | 8  | <a href="#">422271</a>   |
| Tetrachloroethylene | Human | EB (+W) | 142   | 4   | 6  | <a href="#">422271</a>   |
| Tetrahydrofuran     | Human | EB      | 150   | 4   | 16 | <a href="#">10222575</a> |
| Toluene             | Rat   | BL      | 100   | 2   | 7  | <a href="#">629888</a>   |
| Trichloroethylene   | Rat   | EB      | 50    | 2   | 31 | <a href="#">1891776</a>  |
| Trichloroethylene   | Rat   | EB      | 100   | 4   | 17 | <a href="#">629888</a>   |
| Trichloroethylene   | Rat   | EB      | 500   | 2   | 31 | <a href="#">1891776</a>  |
| Trichloroethylene   | Rat   | VBL     | 600   | 4   | 6  | <a href="#">2315918</a>  |
| Trichloroethylene   | Rat   | VBL     | 600.4 | 4   | 6  | <a href="#">2315918</a>  |
| Trichloroethylene   | Rat   | BL      | 100   | 4   | 11 | <a href="#">629888</a>   |
| Trichloroethylene   | Rat   | BL      | 529   | 4   | 5  | <a href="#">2068722</a>  |
| Trichloroethylene   | Rat   | BL      | 600   | 4   | 5  | <a href="#">2068722</a>  |
| Trichloroethylene   | Rat   | BL      | 600.4 | 4   | 5  | <a href="#">2749729</a>  |
| Trichloroethylene   | Human | EB      | 100   | 4   | 41 | <a href="#">9853003</a>  |
| Trichloroethylene   | Human | BL      | 50    | 4   | 45 | <a href="#">9853003</a>  |
| Trichloroethylene   | Human | BL      | 100   | 4   | 28 | <a href="#">9721257</a>  |
| Vinyl chloride      | Human | EB      | 2.5   | 0.2 | 23 | <a href="#">11453305</a> |
| Vinyl chloride      | Human | EB      | 2.5   | 0.5 | 24 | <a href="#">11453305</a> |

<sup>a</sup>Source is a Defense Technical Information Center report, not indexed on PubMed; PMID, unique PubMed article ID number (for use on <https://www.ncbi.nlm.nih.gov/pubmed/>); EB, unspecified exhaled breath sample (assumed to be end-exhaled breath); VBL, venous blood; ABL, arterial blood; BL, unspecified blood sample (assumed to be venous blood); (+W), indicates there was also some light work or exercise during exposure.

Table S3: “Leave one out” sensitivity analysis. Table describes the goodness-of-fit parameters for log-transformed data detailed in the results if each of the 41 chemicals is individually left out of the regressions (compare to the top row with “None” left out).

| <b>Chemical Dropped</b>               | <b>Overall<br/>Reg<br/>Slope</b> | <b>Overall<br/>Reg<br/>r<sup>2</sup></b> | <b>Overall<br/>Reg<br/>RMSE</b> | <b>Overall<br/>DC<sup>a</sup><br/>RMSE</b> | <b>% Data<br/>Censored</b> | <b>Cmax<br/>Reg<br/>Slope</b> | <b>Cmax<br/>Reg<br/>r<sup>2</sup></b> | <b>Cmax<br/>DC<sup>a</sup><br/>RMSE</b> | <b>AUC<br/>Reg<br/>Slope</b> | <b>AUC<br/>Reg<br/>r<sup>2</sup></b> | <b>AUC<br/>DC<sup>a</sup><br/>RMSE</b> |
|---------------------------------------|----------------------------------|------------------------------------------|---------------------------------|--------------------------------------------|----------------------------|-------------------------------|---------------------------------------|-----------------------------------------|------------------------------|--------------------------------------|----------------------------------------|
| None                                  | 0.46                             | 0.45                                     | 0.76                            | 1.11                                       | 0.93                       | 0.88                          | 0.67                                  | 0.47                                    | 1.02                         | 0.79                                 | 0.50                                   |
| 1,1-Dichloroethylene                  | 0.44                             | 0.43                                     | 0.76                            | 1.17                                       | 1.05                       | 0.86                          | 0.67                                  | 0.48                                    | 1.02                         | 0.79                                 | 0.51                                   |
| 1,1,1-Trichloroethane                 | 0.47                             | 0.43                                     | 0.76                            | 1.06                                       | 0.95                       | 0.87                          | 0.68                                  | 0.48                                    | 1.02                         | 0.79                                 | 0.50                                   |
| 1,1,1,2-Tetrafluoroethane             | 0.46                             | 0.44                                     | 0.76                            | 1.12                                       | 0.97                       | 0.88                          | 0.68                                  | 0.48                                    | 1.02                         | 0.79                                 | 0.50                                   |
| 1,1,2-Trichloro-1,2,2-trifluoroethane | 0.46                             | 0.45                                     | 0.76                            | 1.11                                       | 0.94                       | 0.88                          | 0.68                                  | 0.47                                    | 1.02                         | 0.79                                 | 0.50                                   |
| 1,2-Dichloroethane                    | 0.46                             | 0.45                                     | 0.76                            | 1.12                                       | 0.95                       | 0.87                          | 0.68                                  | 0.47                                    | 1.02                         | 0.79                                 | 0.50                                   |
| 1,2-Dichloropropane                   | 0.46                             | 0.44                                     | 0.76                            | 1.12                                       | 0.95                       | 0.87                          | 0.67                                  | 0.48                                    | 1.02                         | 0.79                                 | 0.51                                   |
| 1,2,4-Trimethylbenzene                | 0.46                             | 0.44                                     | 0.76                            | 1.11                                       | 0.95                       | 0.88                          | 0.67                                  | 0.48                                    | 1.02                         | 0.79                                 | 0.50                                   |
| 1,3-Butadiene                         | 0.46                             | 0.44                                     | 0.76                            | 1.12                                       | 0.96                       | 0.87                          | 0.67                                  | 0.48                                    | 1.02                         | 0.79                                 | 0.51                                   |
| 1,4-Dioxane                           | 0.46                             | 0.45                                     | 0.76                            | 1.11                                       | 0.94                       | 0.88                          | 0.68                                  | 0.47                                    | 1.02                         | 0.79                                 | 0.50                                   |
| 2-Butoxyethanol                       | 0.46                             | 0.45                                     | 0.76                            | 1.11                                       | 0.94                       | 0.88                          | 0.68                                  | 0.48                                    | 1.02                         | 0.79                                 | 0.50                                   |
| 2,2-Dichloro-1,1,1-trifluoroethane    | 0.48                             | 0.46                                     | 0.76                            | 1.07                                       | 0.94                       | 0.87                          | 0.66                                  | 0.48                                    | 1.02                         | 0.79                                 | 0.50                                   |
| 2H-Perfluoropropane                   | 0.48                             | 0.49                                     | 0.76                            | 1.09                                       | 0.97                       | 0.91                          | 0.74                                  | 0.43                                    | 1.02                         | 0.79                                 | 0.45                                   |
| Acrylonitrile                         | 0.46                             | 0.45                                     | 0.76                            | 1.11                                       | 0.94                       | 0.88                          | 0.68                                  | 0.48                                    | 1.02                         | 0.79                                 | 0.50                                   |
| Benzene                               | 0.41                             | 0.41                                     | 0.76                            | 1.14                                       | 0.98                       | 0.86                          | 0.64                                  | 0.49                                    | 1.02                         | 0.79                                 | 0.51                                   |
| Bromotrifluoromethane                 | 0.47                             | 0.45                                     | 0.76                            | 1.11                                       | 0.91                       | 0.88                          | 0.68                                  | 0.48                                    | 1.02                         | 0.79                                 | 0.50                                   |
| Carbon tetrachloride                  | 0.48                             | 0.46                                     | 0.76                            | 1.07                                       | 0.91                       | 0.88                          | 0.67                                  | 0.48                                    | 1.02                         | 0.79                                 | 0.50                                   |
| Chlorobenzene                         | 0.46                             | 0.44                                     | 0.76                            | 1.12                                       | 0.95                       | 0.88                          | 0.67                                  | 0.48                                    | 1.02                         | 0.79                                 | 0.50                                   |
| Chloroform                            | 0.46                             | 0.45                                     | 0.76                            | 1.11                                       | 0.94                       | 0.88                          | 0.68                                  | 0.48                                    | 1.02                         | 0.79                                 | 0.50                                   |
| Decane                                | 0.47                             | 0.45                                     | 0.76                            | 1.11                                       | 0.94                       | 0.88                          | 0.68                                  | 0.47                                    | 1.02                         | 0.79                                 | 0.49                                   |
| Dichlorodifluoromethane               | 0.46                             | 0.45                                     | 0.76                            | 1.12                                       | 0.97                       | 0.87                          | 0.67                                  | 0.48                                    | 1.02                         | 0.79                                 | 0.50                                   |
| Dichloromethane                       | 0.46                             | 0.44                                     | 0.76                            | 1.11                                       | 0.58                       | 0.87                          | 0.67                                  | 0.48                                    | 1.02                         | 0.79                                 | 0.51                                   |
| Ethanol                               | 0.46                             | 0.45                                     | 0.76                            | 1.11                                       | 0.71                       | 0.89                          | 0.69                                  | 0.47                                    | 1.02                         | 0.79                                 | 0.50                                   |
| Ethyl T-butyl ether                   | 0.46                             | 0.45                                     | 0.76                            | 1.11                                       | 0.94                       | 0.88                          | 0.67                                  | 0.48                                    | 1.02                         | 0.79                                 | 0.50                                   |
| Ethylbenzene                          | 0.46                             | 0.45                                     | 0.76                            | 1.11                                       | 0.94                       | 0.87                          | 0.67                                  | 0.48                                    | 1.02                         | 0.79                                 | 0.50                                   |
| Furan                                 | 0.46                             | 0.45                                     | 0.76                            | 1.11                                       | 0.94                       | 0.88                          | 0.69                                  | 0.46                                    | 1.02                         | 0.79                                 | 0.49                                   |
| Isopropanol                           | 0.46                             | 0.45                                     | 0.76                            | 1.11                                       | 0.97                       | 0.84                          | 0.66                                  | 0.47                                    | 1.02                         | 0.79                                 | 0.50                                   |



|                                |      |      |      |      |      |      |      |      |      |      |      |
|--------------------------------|------|------|------|------|------|------|------|------|------|------|------|
| <b>Methanol</b>                | 0.46 | 0.44 | 0.76 | 1.11 | 0.95 | 0.86 | 0.65 | 0.48 | 1.02 | 0.79 | 0.50 |
| <b>Methyl ethyl ketone</b>     | 0.46 | 0.45 | 0.76 | 1.12 | 0.97 | 0.87 | 0.68 | 0.47 | 1.02 | 0.79 | 0.50 |
| <b>Methyl tert-butyl ether</b> | 0.46 | 0.44 | 0.76 | 1.11 | 0.85 | 0.88 | 0.67 | 0.48 | 1.02 | 0.79 | 0.51 |
| <b>n-Hexane</b>                | 0.46 | 0.45 | 0.76 | 1.10 | 0.89 | 0.87 | 0.67 | 0.48 | 1.02 | 0.79 | 0.50 |
| <b>N-Methyl-2-pyrrolidone</b>  | 0.46 | 0.45 | 0.76 | 1.12 | 0.95 | 0.89 | 0.67 | 0.48 | 1.02 | 0.79 | 0.51 |
| <b>Nonane</b>                  | 0.46 | 0.45 | 0.76 | 1.11 | 0.95 | 0.88 | 0.68 | 0.48 | 1.02 | 0.79 | 0.50 |
| <b>Octane</b>                  | 0.46 | 0.45 | 0.76 | 1.11 | 0.94 | 0.88 | 0.67 | 0.48 | 1.02 | 0.79 | 0.50 |
| <b>Pyrene</b>                  | 0.46 | 0.46 | 0.76 | 1.10 | 0.95 | 0.92 | 0.74 | 0.43 | 1.02 | 0.79 | 0.46 |
| <b>Styrene</b>                 | 0.47 | 0.44 | 0.76 | 1.06 | 0.99 | 0.85 | 0.67 | 0.48 | 1.02 | 0.79 | 0.51 |
| <b>tert-Amyl methyl ether</b>  | 0.46 | 0.44 | 0.76 | 1.11 | 0.90 | 0.88 | 0.66 | 0.48 | 1.02 | 0.79 | 0.51 |
| <b>Tetrachloroethylene</b>     | 0.46 | 0.44 | 0.76 | 1.11 | 0.96 | 0.88 | 0.68 | 0.48 | 1.02 | 0.79 | 0.50 |
| <b>Tetrahydrofuran</b>         | 0.47 | 0.45 | 0.76 | 1.09 | 0.94 | 0.87 | 0.68 | 0.47 | 1.02 | 0.79 | 0.49 |
| <b>Toluene</b>                 | 0.46 | 0.45 | 0.76 | 1.11 | 0.94 | 0.88 | 0.68 | 0.48 | 1.02 | 0.79 | 0.50 |
| <b>Trichloroethylene</b>       | 0.48 | 0.45 | 0.76 | 1.09 | 1.05 | 0.86 | 0.67 | 0.49 | 1.02 | 0.79 | 0.52 |
| <b>Vinyl chloride</b>          | 0.46 | 0.44 | 0.76 | 1.12 | 0.95 | 0.87 | 0.67 | 0.48 | 1.02 | 0.79 | 0.50 |

<sup>a</sup>DC (Direct Comparison) indicates RMSE was calculated directly between log-transformed simulated and observed data (i.e. with the assumption  $y = x$ ); Reg, Regression; RMSE, Root Mean Square Error; Cmax, Maximum concentration; AUC, area under the concentration time curve.

Table S4: Variability in fit slope and Root Mean Square Error (RMSE) vs. identity line with variable upper respiratory tract clearance constant (KurtC) value.

| <b>KurtC (L/hr/kg<sup>0.75</sup>)</b> | <b>Slope</b> | <b>RMSE</b> |
|---------------------------------------|--------------|-------------|
| <b>1E-5</b>                           | 0.45         | 1.14        |
| <b>1E-4</b>                           | 0.47         | 1.09        |
| <b>1E-3</b>                           | 0.42         | 1.21        |
| <b>1E-2</b>                           | 0.40         | 1.24        |
| <b>1E-1</b>                           | 0.40         | 1.24        |
| <b>1</b>                              | 0.42         | 1.20        |
| <b>2</b>                              | 0.42         | 1.19        |
| <b>3</b>                              | 0.42         | 1.20        |
| <b>4</b>                              | 0.42         | 1.20        |
| <b>5</b>                              | 0.43         | 1.18        |
| <b>6</b>                              | 0.43         | 1.17        |
| <b>7</b>                              | 0.44         | 1.16        |
| <b>8</b>                              | 0.45         | 1.14        |
| <b>9</b>                              | 0.45         | 1.13        |
| <b>10</b>                             | 0.46         | 1.12        |
| <b>11</b>                             | 0.46         | 1.11        |
| <b>12</b>                             | 0.47         | 1.10        |
| <b>13</b>                             | 0.47         | 1.09        |
| <b>14</b>                             | 0.48         | 1.08        |
| <b>15</b>                             | 0.48         | 1.07        |
| <b>16</b>                             | 0.49         | 1.06        |
| <b>17</b>                             | 0.49         | 1.06        |
| <b>18</b>                             | 0.49         | 1.06        |
| <b>19</b>                             | 0.50         | 1.05        |
| <b>20</b>                             | 0.50         | 1.05        |

Table S5: List of concentration-time datapoints that had &gt;2 orders of magnitude difference between simulated and observed concentrations

| Chemical                                  | CAMEO Chemical Class         | Species | Sample Matrix | Time Quartile of Sample <sup>a</sup> | Log(SIM) | Log(OBS) | Log(SIM) - Log(OBS) |
|-------------------------------------------|------------------------------|---------|---------------|--------------------------------------|----------|----------|---------------------|
| <b>2,2-Dichloro-1,1,1-trifluoroethane</b> | Fluorinated organic compound | Rat     | VBL           | 4                                    | -9.15    | 0.31     | -9.47               |
| <b>2,2-Dichloro-1,1,1-trifluoroethane</b> | Fluorinated organic compound | Rat     | VBL           | 4                                    | -8.15    | 0.76     | -8.92               |
| <b>Carbon tetrachloride</b>               | Halogenated organic compound | Rat     | ABL           | 4                                    | -7.45    | 0.02     | -7.46               |
| <b>Trichloroethylene</b>                  | Halogenated organic compound | Rat     | EB            | 4                                    | -7.71    | -0.41    | -7.3                |
| <b>Trichloroethylene</b>                  | Halogenated organic compound | Rat     | BL            | 4                                    | -7.43    | -0.59    | -6.85               |
| <b>Carbon tetrachloride</b>               | Halogenated organic compound | Rat     | ABL           | 4                                    | -6.53    | 0.19     | -6.72               |
| <b>1,1,1-Trichloroethane</b>              | Halogenated organic compound | Human   | EB            | 4                                    | -8.79    | -2.12    | -6.67               |
| <b>1,1,1-Trichloroethane</b>              | Halogenated organic compound | Human   | EB (+W)       | 4                                    | -8.46    | -1.86    | -6.6                |
| <b>Trichloroethylene</b>                  | Halogenated organic compound | Rat     | EB            | 4                                    | -6.84    | -0.29    | -6.55               |
| <b>1,1,1-Trichloroethane</b>              | Halogenated organic compound | Human   | EB            | 4                                    | -8.46    | -1.92    | -6.54               |
| <b>Styrene</b>                            | Aromatic hydrocarbon         | Rat     | BL            | 4                                    | -6.21    | 0.23     | -6.44               |
| <b>Isopropanol</b>                        | Alcohol                      | Rat     | VBL           | 4                                    | -3.64    | 2.31     | -5.95               |
| <b>Styrene</b>                            | Aromatic hydrocarbon         | Rat     | BL            | 4                                    | -6.51    | -0.72    | -5.8                |
| <b>Carbon tetrachloride</b>               | Halogenated organic compound | Rat     | ABL           | 4                                    | -5.6     | 0.16     | -5.75               |
| <b>Trichloroethylene</b>                  | Halogenated organic compound | Rat     | EB            | 4                                    | -5.97    | -0.29    | -5.68               |
| <b>Styrene</b>                            | Aromatic hydrocarbon         | Rat     | BL            | 4                                    | -7.39    | -1.72    | -5.67               |
| <b>Styrene</b>                            | Aromatic hydrocarbon         | Rat     | BL            | 4                                    | -6.98    | -1.54    | -5.44               |
| <b>Dichloromethane</b>                    | Halogenated organic compound | Human   | VBL           | 4                                    | -5.78    | -0.37    | -5.41               |
| <b>1,1,1-Trichloroethane</b>              | Halogenated organic compound | Human   | EB (+W)       | 4                                    | -7.02    | -1.65    | -5.37               |
| <b>1,1,1-Trichloroethane</b>              | Halogenated organic compound | Human   | EB            | 4                                    | -7.32    | -1.99    | -5.33               |
| <b>1,1,1-Trichloroethane</b>              | Halogenated organic compound | Human   | EB            | 4                                    | -7.01    | -1.71    | -5.31               |
| <b>Trichloroethylene</b>                  | Halogenated organic compound | Rat     | BL            | 4                                    | -5.7     | -0.41    | -5.29               |
| <b>Styrene</b>                            | Aromatic hydrocarbon         | Rat     | BL            | 4                                    | -4.37    | 0.75     | -5.12               |
| <b>Trichloroethylene</b>                  | Halogenated organic compound | Rat     | EB            | 4                                    | -5.1     | -0.18    | -4.92               |
| <b>Carbon tetrachloride</b>               | Halogenated organic compound | Rat     | ABL           | 4                                    | -4.69    | 0.16     | -4.85               |
| <b>n-Hexane</b>                           | Aliphatic hydrocarbon        | Rat     | BL            | 4                                    | -4.85    | -0.16    | -4.69               |
| <b>Styrene</b>                            | Aromatic hydrocarbon         | Rat     | BL            | 4                                    | -4.61    | 0.05     | -4.66               |

|                                           |                              |       |     |   |       |       |       |
|-------------------------------------------|------------------------------|-------|-----|---|-------|-------|-------|
| <b>Trichloroethylene</b>                  | Halogenated organic compound | Rat   | BL  | 4 | -3.24 | 1.41  | -4.65 |
| <b>2,2-Dichloro-1,1,1-trifluoroethane</b> | Fluorinated organic compound | Rat   | VBL | 3 | -3.58 | 0.65  | -4.23 |
| <b>Carbon tetrachloride</b>               | Halogenated organic compound | Rat   | ABL | 3 | -3.75 | 0.46  | -4.21 |
| <b>Tetrahydrofuran</b>                    | Ether                        | Human | EB  | 4 | -3.76 | 0.42  | -4.18 |
| <b>Trichloroethylene</b>                  | Halogenated organic compound | Rat   | EB  | 3 | -4.23 | -0.09 | -4.14 |
| <b>Methanol</b>                           | Alcohol                      | Rat   | BL  | 4 | -2.76 | 1.34  | -4.1  |
| <b>Styrene</b>                            | Aromatic hydrocarbon         | Rat   | BL  | 3 | -2.47 | 1.63  | -4.1  |
| <b>Tetrachloroethylene</b>                | Halogenated organic compound | Rat   | BL  | 4 | -3.9  | 0.11  | -4.02 |
| <b>Styrene</b>                            | Aromatic hydrocarbon         | Rat   | BL  | 4 | -5.06 | -1.19 | -3.87 |
| <b>Carbon tetrachloride</b>               | Halogenated organic compound | Rat   | ABL | 4 | -4.73 | -0.89 | -3.85 |
| <b>Styrene</b>                            | Aromatic hydrocarbon         | Human | EB  | 4 | -5.39 | -1.62 | -3.77 |
| <b>Trichloroethylene</b>                  | Halogenated organic compound | Rat   | BL  | 3 | -3.96 | -0.23 | -3.72 |
| <b>Styrene</b>                            | Aromatic hydrocarbon         | Human | BL  | 4 | -4.7  | -1.01 | -3.69 |
| <b>Styrene</b>                            | Aromatic hydrocarbon         | Human | BL  | 4 | -4.71 | -1.02 | -3.68 |
| <b>2,2-Dichloro-1,1,1-trifluoroethane</b> | Fluorinated organic compound | Rat   | VBL | 3 | -2.55 | 1.08  | -3.63 |
| <b>Carbon tetrachloride</b>               | Halogenated organic compound | Rat   | ABL | 3 | -2.8  | 0.66  | -3.46 |
| <b>Tetrahydrofuran</b>                    | Ether                        | Human | EB  | 4 | -3.34 | 0.12  | -3.46 |
| <b>Trichloroethylene</b>                  | Halogenated organic compound | Rat   | EB  | 3 | -3.36 | 0.01  | -3.37 |
| <b>Dichloromethane</b>                    | Halogenated organic compound | Human | VBL | 3 | -3.35 | -0.04 | -3.3  |
| <b>Styrene</b>                            | Aromatic hydrocarbon         | Rat   | BL  | 3 | -1.54 | 1.67  | -3.21 |
| <b>Trichloroethylene</b>                  | Halogenated organic compound | Rat   | BL  | 4 | -1.5  | 1.72  | -3.21 |
| <b>Dichloromethane</b>                    | Halogenated organic compound | Human | EB  | 3 | -3.08 | 0.11  | -3.2  |
| <b>Carbon tetrachloride</b>               | Halogenated organic compound | Rat   | ABL | 4 | -3.78 | -0.58 | -3.19 |
| <b>Isopropanol</b>                        | Alcohol                      | Rat   | VBL | 3 | -0.12 | 3.05  | -3.17 |
| <b>Styrene</b>                            | Aromatic hydrocarbon         | Rat   | BL  | 4 | -4.56 | -1.47 | -3.09 |
| <b>Tetrahydrofuran</b>                    | Ether                        | Human | EB  | 4 | -2.93 | 0.12  | -3.05 |
| <b>Dichloromethane</b>                    | Halogenated organic compound | Human | VBL | 3 | -3.89 | -0.85 | -3.04 |
| <b>Styrene</b>                            | Aromatic hydrocarbon         | Rat   | BL  | 3 | -2.7  | 0.31  | -3.02 |
| <b>Trichloroethylene</b>                  | Halogenated organic compound | Rat   | EB  | 3 | -2.93 | 0.02  | -2.95 |
| <b>Styrene</b>                            | Aromatic hydrocarbon         | Rat   | BL  | 3 | -0.6  | 2.26  | -2.86 |
| <b>1,1,1-Trichloroethane</b>              | Halogenated organic compound | Human | EB  | 3 | -4.05 | -1.2  | -2.85 |
| <b>n-Hexane</b>                           | Aliphatic hydrocarbon        | Rat   | BL  | 4 | -3.15 | -0.31 | -2.84 |

|                                |                              |       |         |   |       |       |       |
|--------------------------------|------------------------------|-------|---------|---|-------|-------|-------|
| <b>1,1,1-Trichloroethane</b>   | Halogenated organic compound | Human | EB      | 3 | -4.38 | -1.55 | -2.83 |
| <b>1,1,1-Trichloroethane</b>   | Halogenated organic compound | Human | EB (+W) | 3 | -4.06 | -1.25 | -2.81 |
| <b>Bromotrifluoromethane</b>   | Fluorinated organic compound | Human | VBL     | 4 | -2.27 | 0.5   | -2.76 |
| <b>Tetrahydrofuran</b>         | Ether                        | Human | EB      | 4 | -2.51 | 0.22  | -2.73 |
| <b>Bromotrifluoromethane</b>   | Fluorinated organic compound | Human | VBL     | 4 | -2.2  | 0.5   | -2.7  |
| <b>Methanol</b>                | Alcohol                      | Rat   | BL      | 4 | -1.33 | 1.34  | -2.67 |
| <b>Styrene</b>                 | Aromatic hydrocarbon         | Rat   | BL      | 3 | -3.17 | -0.58 | -2.59 |
| <b>Trichloroethylene</b>       | Halogenated organic compound | Rat   | EB      | 3 | -2.49 | 0.08  | -2.57 |
| <b>Carbon tetrachloride</b>    | Halogenated organic compound | Rat   | ABL     | 2 | -1.87 | 0.69  | -2.56 |
| <b>Methanol</b>                | Alcohol                      | Rat   | BL      | 3 | 0.15  | 2.72  | -2.56 |
| <b>Styrene</b>                 | Aromatic hydrocarbon         | Rat   | BL      | 3 | -1.73 | 0.82  | -2.55 |
| <b>Bromotrifluoromethane</b>   | Fluorinated organic compound | Human | VBL     | 4 | -2.11 | 0.43  | -2.54 |
| <b>tert-Amyl methyl ether</b>  | Ether                        | Human | BL      | 4 | -3.03 | -0.49 | -2.54 |
| <b>Isopropanol</b>             | Alcohol                      | Rat   | VBL     | 4 | -1.12 | 1.41  | -2.53 |
| <b>Benzene</b>                 | Aromatic hydrocarbon         | Rat   | BL      | 4 | -2.02 | 0.49  | -2.51 |
| <b>tert-Amyl methyl ether</b>  | Ether                        | Human | BL      | 4 | -3.55 | -1.06 | -2.49 |
| <b>Benzene</b>                 | Aromatic hydrocarbon         | Rat   | BL      | 4 | -1.94 | 0.46  | -2.4  |
| <b>Tetrachloroethylene</b>     | Halogenated organic compound | Rat   | BL      | 3 | -1.86 | 0.54  | -2.4  |
| <b>Benzene</b>                 | Aromatic hydrocarbon         | Rat   | BL      | 4 | -2.17 | 0.22  | -2.39 |
| <b>Tetrachloroethylene</b>     | Halogenated organic compound | Human | EB (+W) | 4 | -3.04 | -0.65 | -2.39 |
| <b>Tetrachloroethylene</b>     | Halogenated organic compound | Human | EB      | 4 | -3.35 | -1.03 | -2.31 |
| <b>Benzene</b>                 | Aromatic hydrocarbon         | Human | EB      | 4 | -4.07 | -1.79 | -2.28 |
| <b>Tetrachloroethylene</b>     | Halogenated organic compound | Human | BL (+W) | 4 | -2.91 | -0.64 | -2.28 |
| <b>Carbon tetrachloride</b>    | Halogenated organic compound | Rat   | ABL     | 3 | -2.86 | -0.58 | -2.27 |
| <b>Tetrachloroethylene</b>     | Halogenated organic compound | Human | EB      | 4 | -3.04 | -0.78 | -2.26 |
| <b>Bromotrifluoromethane</b>   | Fluorinated organic compound | Human | VBL     | 4 | -2.15 | 0.08  | -2.24 |
| <b>Methyl tert-butyl ether</b> | Ether                        | Human | BL      | 4 | -2.81 | -0.57 | -2.24 |
| <b>Benzene</b>                 | Aromatic hydrocarbon         | Rat   | BL      | 4 | -2.1  | 0.12  | -2.22 |
| <b>Methyl tert-butyl ether</b> | Ether                        | Human | BL      | 4 | -3.6  | -1.4  | -2.21 |
| <b>Bromotrifluoromethane</b>   | Fluorinated organic compound | Human | VBL     | 4 | -1.6  | 0.6   | -2.2  |
| <b>Trichloroethylene</b>       | Halogenated organic compound | Rat   | EB      | 3 | -2.06 | 0.12  | -2.18 |
| <b>Tetrachloroethylene</b>     | Halogenated organic compound | Human | BL      | 4 | -2.91 | -0.75 | -2.16 |

|                            |                              |       |     |   |       |       |       |
|----------------------------|------------------------------|-------|-----|---|-------|-------|-------|
| <b>Trichloroethylene</b>   | Halogenated organic compound | Rat   | BL  | 3 | -2.22 | -0.06 | -2.16 |
| <b>Tetrachloroethylene</b> | Halogenated organic compound | Human | BL  | 4 | -3.23 | -1.1  | -2.13 |
| <b>Tetrahydrofuran</b>     | Ether                        | Human | EB  | 3 | -1.7  | 0.42  | -2.12 |
| <b>Styrene</b>             | Aromatic hydrocarbon         | Rat   | BL  | 3 | -0.88 | 1.18  | -2.06 |
| <b>Benzene</b>             | Aromatic hydrocarbon         | Rat   | BL  | 4 | -1.41 | 0.63  | -2.04 |
| <b>Ethyl T-butyl ether</b> | Ether                        | Human | BL  | 4 | -2.8  | -0.77 | -2.04 |
| <b>Isopropanol</b>         | Alcohol                      | Rat   | VBL | 3 | 1.57  | 3.6   | -2.03 |
| <b>Styrene</b>             | Aromatic hydrocarbon         | Rat   | BL  | 2 | 0.39  | 2.41  | -2.02 |
| <b>Decane</b>              | Aliphatic hydrocarbon        | Rat   | BL  | 3 | 2.22  | 0.21  | 2.01  |
| <b>2H-Perfluoropropane</b> | Fluorinated organic compound | Human | VBL | 3 | 1.96  | -0.1  | 2.06  |

<sup>a</sup>Time quartile of the concentration-time curve from which sample was taken, 1 being the first time quartile of the curve, 4 being the final quartile of the curve; CAMEO, Computer-Aided Management of Emergency Operations, database of hazardous chemical datasheets that emergency responders and planners can use to get response recommendations and predict hazards; SIM, simulated concentration; OBS, observed concentration; EB, unspecified exhaled breath sample (assumed to be end-exhaled breath); VBL, venous blood; ABL, arterial blood; BL, unspecified blood sample (assumed to be venous blood); (+W), indicates there was also some light work or exercise during exposure.

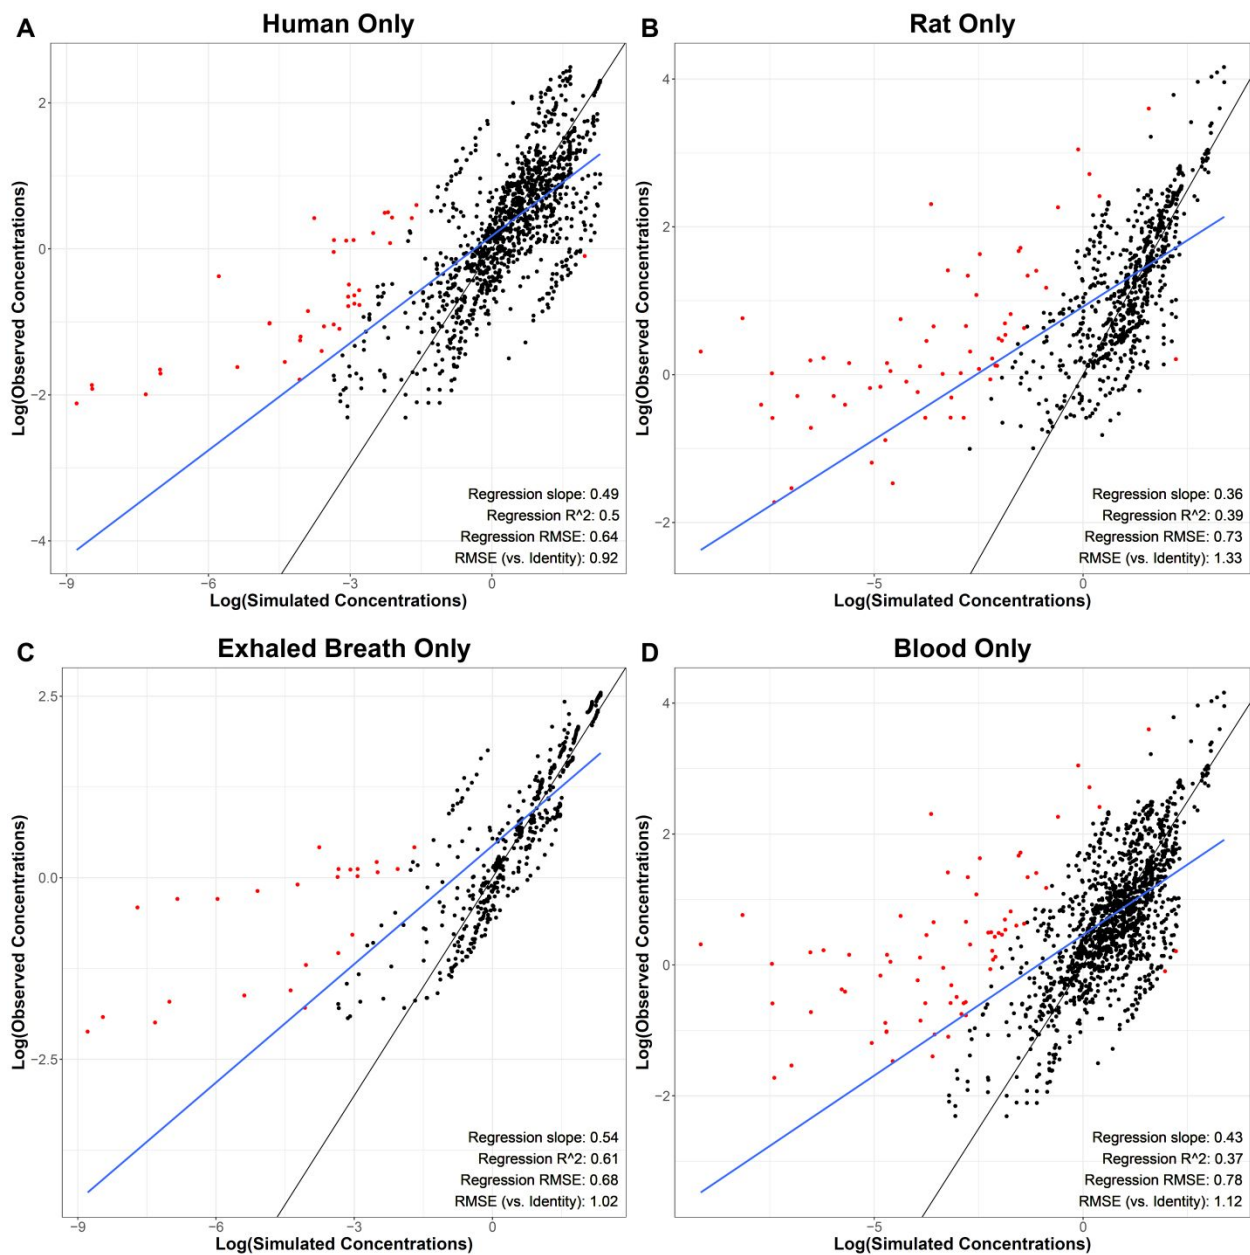

Figure S1: Log-transformed observed (y-axis) vs. simulated (x-axis) concentrations subsetted by species (A: Human, B: Rat) or sampling matrix (C: Aggregated Exhaled Breath [ppm], D: Aggregated Blood [ $\mu$ M]). Aggregated Exhaled Breath includes all unspecified exhaled breath, end exhaled breath, and mixed exhaled breath samples. Aggregated Blood includes all unspecified blood, venous blood, arterial blood, and plasma samples. Blue line is the regression line of best fit. Black line is the line of identity ( $x = y$ ). Red points are  $>2$  log-orders different between observed and simulated values.

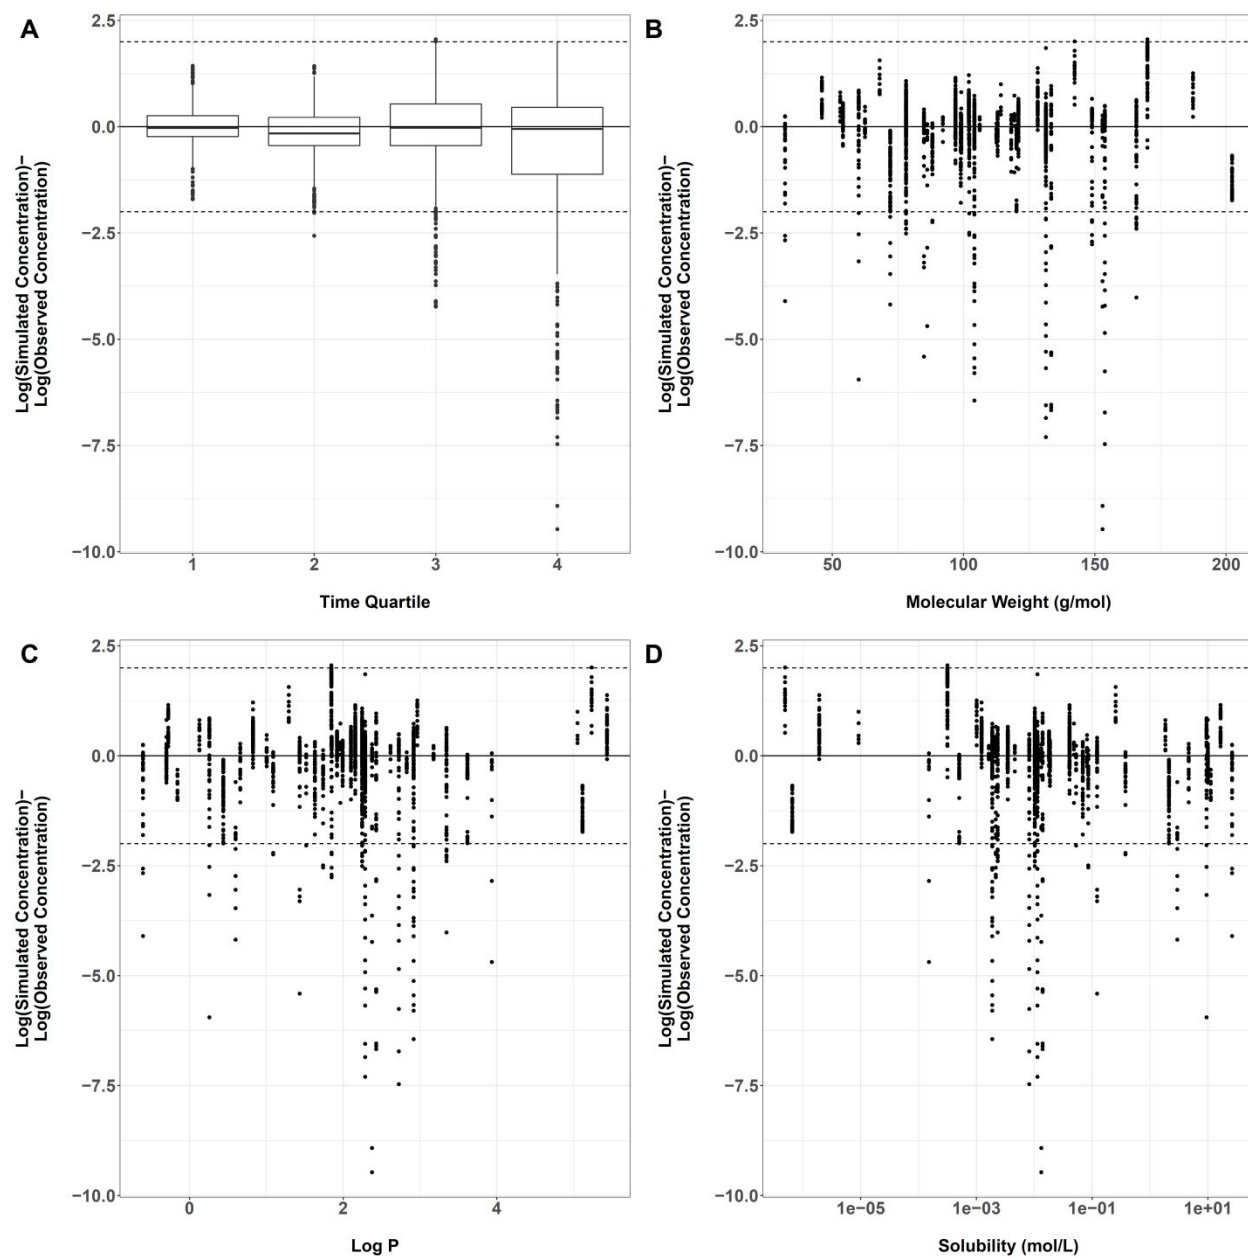

Figure S2 A-D: Log difference between observed and simulated concentrations grouped by time quartile of the concentration-time curve (A), molecular weight (B), log P (C), and solubility (D). Labeled points in S1A are >2 log-orders different between observed and simulated values.



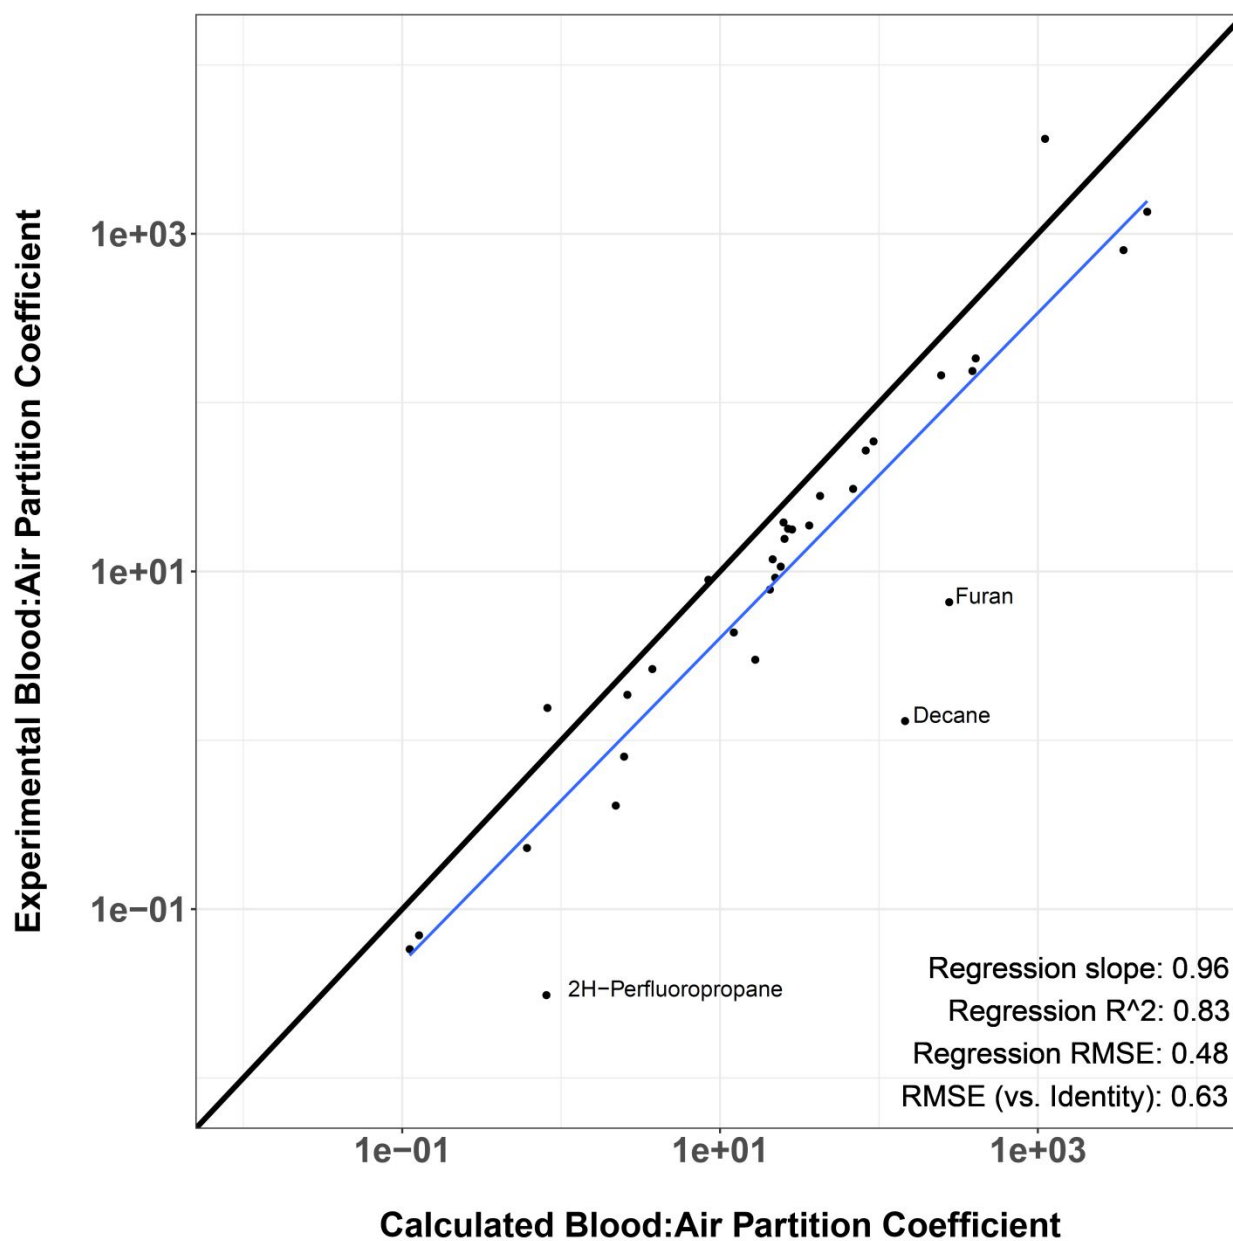

Figure S3: Comparison of experimentally-derived (from literature) and calculated blood:air partition coefficients. Labeled points were > 1 log-order different between experimental and calculated values. Blue line is regression line of best fit with the slope and  $r^2$  value noted in the bottom. Black line is the line of identity ( $x = y$ ). RMSE is compared to line of identity.

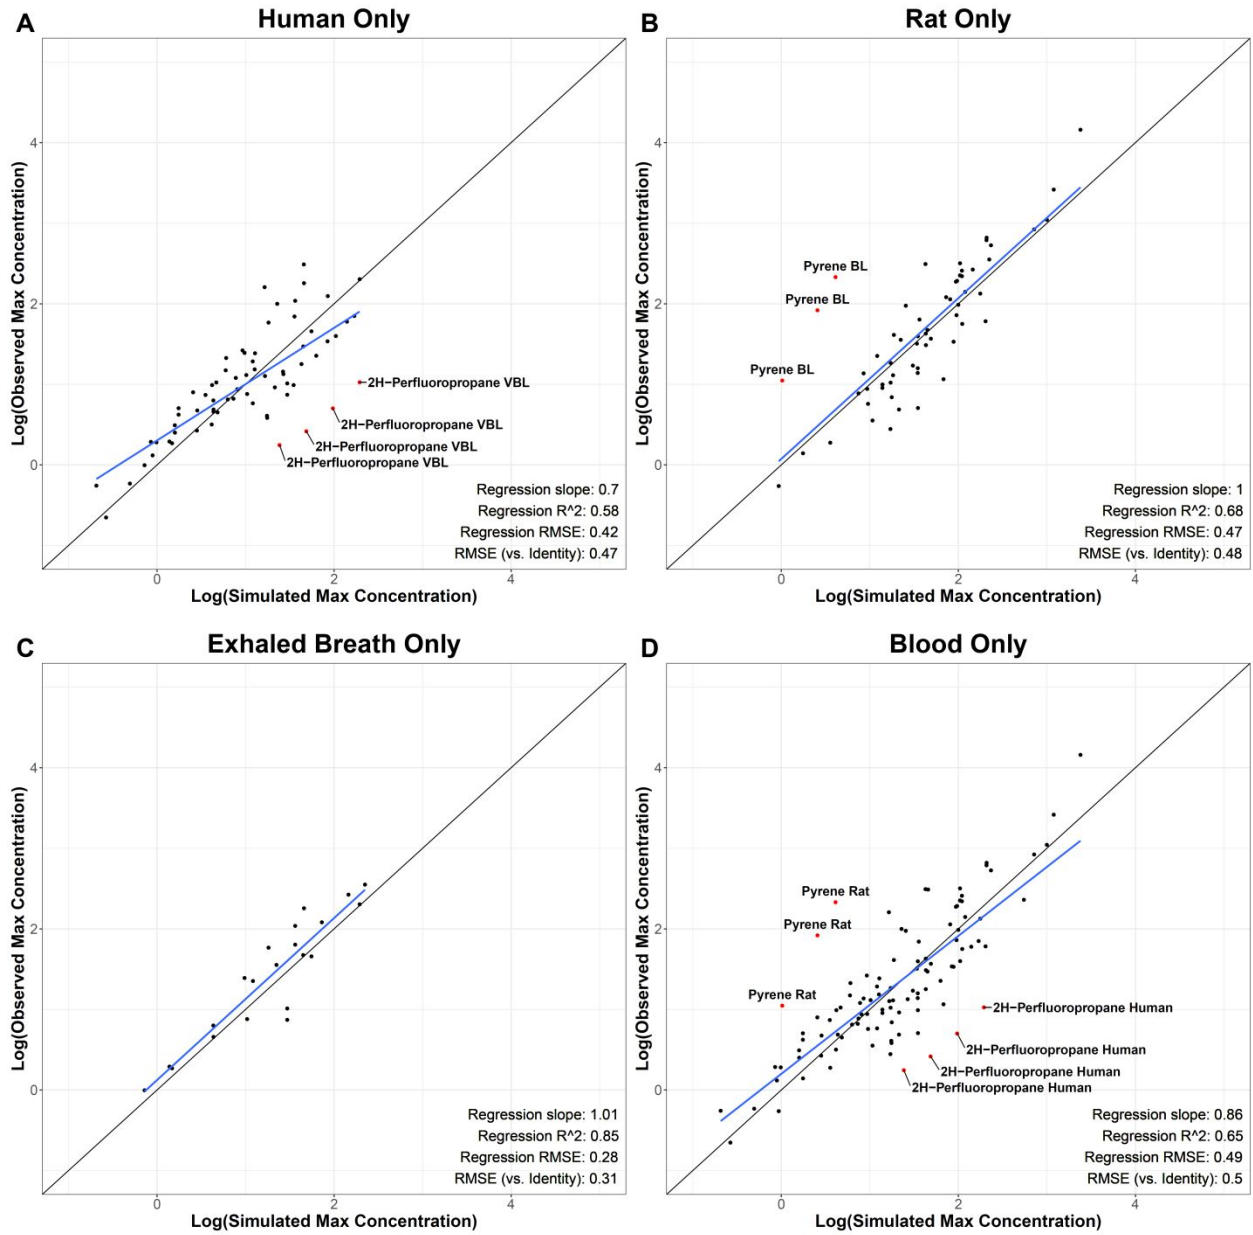

Figure S4: Log-transformed observed (y-axis) vs. simulated (x-axis) max concentrations subsetted by species (A: Human, B: Rat) or sampling matrix (C: Aggregated Exhaled Breath [ppm], D: Aggregated Blood [ $\mu$ M]). Aggregated Exhaled Breath includes all unspecified exhaled breath, end exhaled breath, and mixed exhaled breath samples. Aggregated Blood includes all unspecified blood, venous blood, arterial blood, and plasma samples. Blue line is the regression line of best fit. Black line is the line of identity ( $x = y$ ). Labeled red points are  $>1$  log-order different between observed and simulated values.

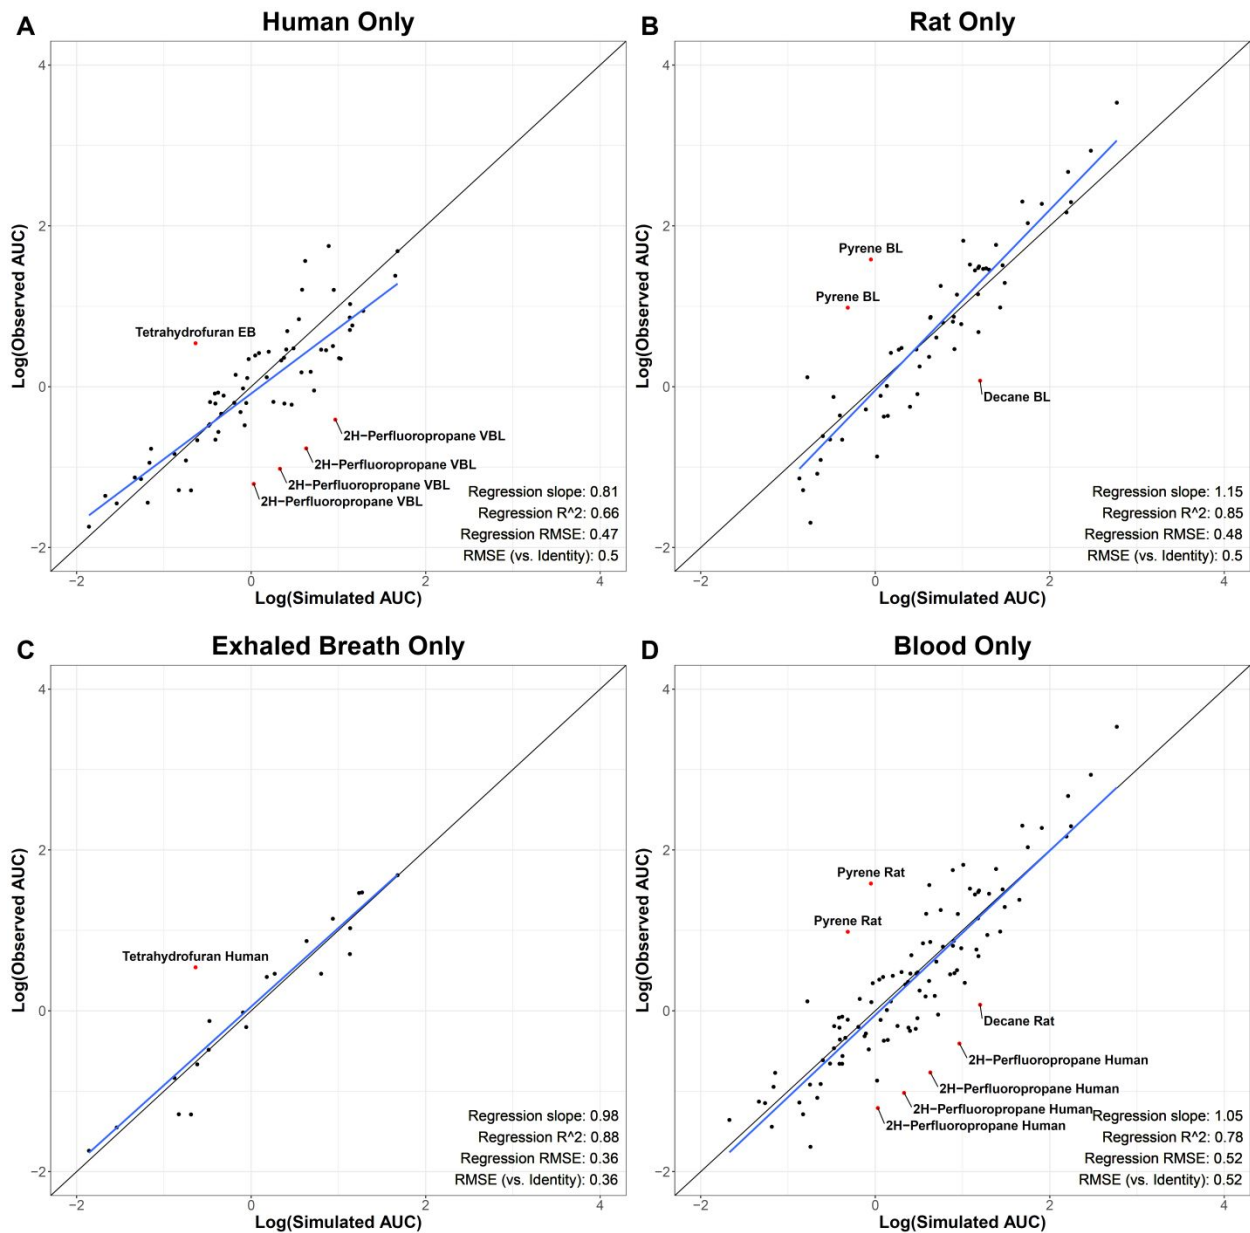

Figure S5: Log-transformed observed (y-axis) vs. simulated (x-axis) area under the concentration-time curve (AUC) subsetted by species (A: Human, B: Rat) or sampling matrix (C: Aggregated Exhaled Breath [ppm], D: Aggregated Blood [ $\mu$ M]). Aggregated Exhaled Breath includes all unspecified exhaled breath, end exhaled breath, and mixed exhaled breath samples. Aggregated Blood includes all unspecified blood, venous blood, arterial blood, and plasma samples. Blue line is the regression line of best fit. Black line is the line of identity ( $x = y$ ). Labeled red points are  $>1$  log-order different between observed and simulated values.

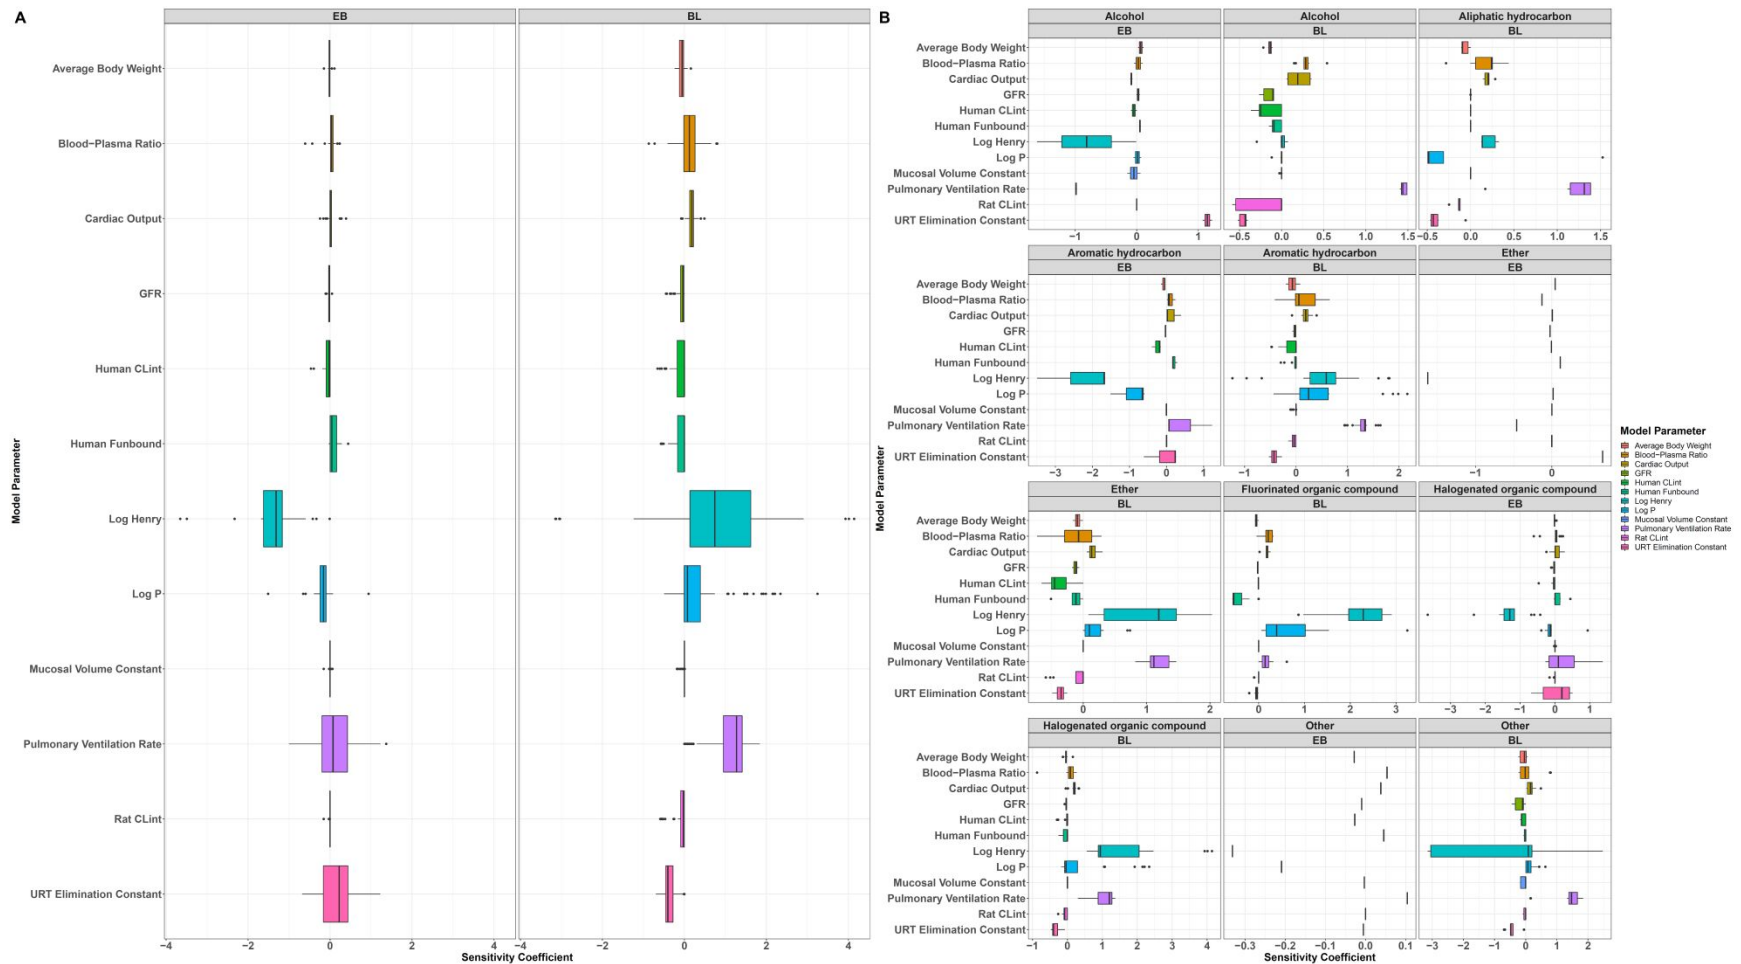

## Model Code Supplement:

```
/* inhalation.c for R deSolve package
```

---

```
Model File:  inhalation.model
```

```
Date:
```

```
Created by:
```

```
-- a model preprocessor by Don Maszle
```

---

```
Copyright (c) 1993-2015 Free Software Foundation, Inc.
```

The following section is entirely a commented list of states, inputs, outputs, and parameters and their default values (where applicable).

```
Model calculations for compartmental model:
```

```
14 States (user input units):
```

```
  Agutlumen = 0.0,           //Amount in the gut lumen
  Agut = 0.0,                //Amount in the gut
  Aliver = 0.0,             //Amount in the liver
  Aven = 0.0,               //Amount in venous circulation
  Along = 0.0,             //Amount in the lung tissue
  Aart = 0.0,              //Amount in arterial circulation
  Arest = 0.0,             //Amount in the "rest-of-body" compartment
  Akidney = 0.0,           //Amount in the kidney
  Atubules = 0.0,          //Amount in the tubules
  Ametabolized = 0.0,      //Amount metabolized (cumulative)
  AUC = 0.0,               //Area under concentration-time curve
  Ainh = 0.0,              //Amount inhaled
  Aexh = 0.0,              //Amount exhaled
  Amuc = 0.0,              //Amount in mucus
```

```
13 Outputs (user input units):
```

```
"Cgut",                    //Concentration in the gut
"Cliver",                  //Concentration in the liver
"Cven",                    //Concentration in venous circulation
"Clung",                   //Concentration in the lung tissue
"Cart",                    //Concentration in arterial circulation
"Crest",                   //Concentration in the "rest-of-body" compartment
"Ckidney",                 //Concentration in the kidney
"Cplasma",                 //Concentration in the plasma
"Aplasma",                 //Amount in the plasma
"Calv",                    //Concentration in the alveolar space
"Cendexh",                 //Concentration in end-exhaled breath
"Cmixexh",                 //Concentration in mix-exhaled breath
"Cmuc",                    //Concentration in the mucus
```

```
1 Input (user input units):
```

```
  Cinh (forcing function) //Inhalation (exposure) concentration
```

## 53 Parameters:

```

BW = 70, //Body weight (kg)
Clmetabolismc = 0.203, //Unscaled metabolism parameter (L/d/kg0.75)
vmax = 0, //Unscaled Vmax (mg/h/kg0.75)
hematocrit = 0.44, //Hematocrit concentration (units)
kgutabs = 1, //Gut absorption coefficient (%)
Kkidney2pu = 0, //Kidney-Unbound Plasma partition coefficient
Kliver2pu = 0, //Liver-Unbound Plasma partition coefficient
Krest2pu = 0, //Rest-Unbound Plasma partition coefficient
Kgut2pu = 0, //Gut-Unbound Plasma partition coefficient
Klung2pu = 0, //Lung-Unbound Plasma partition coefficient
Qcardiac = 4.8, //Unscaled cardiac output (CO, L/d)
Qgfr = 0.108, //Unscaled glomerular filtration rate (units)
Qgut = 0.205, //Gut blood flow (fraction of CO)
Qkidney = 0.221, //Kidney blood flow (fraction of CO)
Qliver = 0.0536, //Liver blood flow (fraction of CO)
Qlung = 0, //Lung blood flow (fraction of CO)
Vartc = 0.0487, //Unscaled arterial volume (L/kg)
Vgut = 0.0158, //Unscaled gut volume (L/kg)
Vkidney = 0.00119, //Unscaled kidney volume (L/kg)
Vliver = 0.02448, //Unscaled liver volume (L/kg)
Vlung = 0.00723, //Unscaled lung volume (L/kg)
Vrest = 0.77654, //Unscaled "rest-of-body" volume (L/kg)
Vven = 0.0487, //Unscaled venous volume (L/kg)
Fraction_unbound_plasma = 0.0682,
Rblood2plasma = 0.0, //Blood-to-plasma ratio
Clmetabolism = 0.0, //Hepatic metabolic clearance (L/d)
Qcardiac = 0.0, //Cardiac output (L/d)
Qgfr = 0.0, //Glomerular filtration (L/d)
Qgut = 0.0, //Gut blood flow (L/d)
Qkidney = 0.0, //Kidney blood flow (L/d)
Qliver = 0.0, //Liver blood flow (L/d)
Qlung = 0.0, //Lung blood flow (L/d)
Qrest = 0.0, // "Rest-of-body" blood flow (L/d)
Vart = 0.0, //Arterial volume (L)
Vgut = 0.0, //Gut volume (L)
Vkidney = 0.0, //Kidney volume (L)
Vliver = 0.0, //Liver volume (L)
Vlung = 0.0, //Lung volume (L)
Vrest = 0.0, // "Rest-of-body" volume (L)
Vven = 0.0, //Venous volume (L)
Qalv = 0, //Alveolar ventilation (L/d)
Kblood2air = 0, //Blood-air partition coefficient
InhMag = 0, //Unused parameter
Period = 0, //Time between exposure events (h)
Exposure = 0, //External chemical exposure (user input units)
kUrtc = 11.0, //Unscaled upper respiratory tract uptake parameter (L/h/kg0.75)
kUrt = 0, //Upper respiratory tract uptake parameter (L/h)
Kmuc2air = 0, //Mucus to air partition coefficient
Vmucc = 0.0001, //Unscaled mucosal volume (L)
Vmuc = 0.0, //Mucosal volume (L)

```

```

        Vmax = 0,                //Maximum metabolism rate (mg/h)
        Km = 1,                  //Michaelis-Menten Coefficient (mg/L)
*/

#include <R.h>

/*These next sections define the States, Outputs, and Parameters for the model, see definitions above*/

/* Model variables: States */
#define ID_Agutlumen 0x00000
#define ID_Agut 0x00001
#define ID_Aliver 0x00002
#define ID_Aven 0x00003
#define ID_Alung 0x00004
#define ID_Aart 0x00005
#define ID_Arest 0x00006
#define ID_Akidney 0x00007
#define ID_Atubules 0x00008
#define ID_Ametabolized 0x00009
#define ID_AUC 0x0000a
#define ID_Ainh 0x0000b
#define ID_Aexh 0x0000c
#define ID_Amuc 0x0000d

/* Model variables: Outputs */
#define ID_Cgut 0x00000
#define ID_Cliver 0x00001
#define ID_Cven 0x00002
#define ID_Clung 0x00003
#define ID_Cart 0x00004
#define ID_Crest 0x00005
#define ID_Ckidney 0x00006
#define ID_Cplasma 0x00007
#define ID_Aplasma 0x00008
#define ID_Calv 0x00009
#define ID_Cendexh 0x0000a
#define ID_Cmixexh 0x0000b
#define ID_Cmuc 0x0000c

/* Parameters */
static double parms[53];

#define BW parms[0]
#define Clmetabolismc parms[1]
#define vmax parms[2]
#define km parms[3]
#define hematocrit parms[4]
#define kgutabs parms[5]
#define Kkidney2pu parms[6]
#define Kliver2pu parms[7]
#define Krest2pu parms[8]
#define Kgut2pu parms[9]
#define Klung2pu parms[10]
#define Qcardiacc parms[11]
#define Qgfrc parms[12]

```

```

#define Qgutf parms[13]
#define Qkidneyf parms[14]
#define Qliverf parms[15]
#define Qlungf parms[16]
#define Vartc parms[17]
#define Vgutc parms[18]
#define Vkidneyc parms[19]
#define Vliverc parms[20]
#define Vlungc parms[21]
#define Vrestc parms[22]
#define Vvenc parms[23]
#define Fraction_unbound_plasma parms[24]
#define Rblood2plasma parms[25]
#define Clmetabolism parms[26]
#define Qcardiac parms[27]
#define Qgfr parms[28]
#define Qgut parms[29]
#define Qkidney parms[30]
#define Qliver parms[31]
#define Qlung parms[32]
#define Qrest parms[33]
#define Vart parms[34]
#define Vgut parms[35]
#define Vkidney parms[36]
#define Vliver parms[37]
#define Vlung parms[38]
#define Vrest parms[39]
#define Vven parms[40]
#define Qalv parms[41]
#define Kblood2air parms[42]
#define InhMag parms[43]
#define Period parms[44]
#define Exposure parms[45]
#define kUrtc parms[46]
#define kUrt parms[47]
#define Kmuc2air parms[48]
#define Vmucc parms[49]
#define Vmuc parms[50]
#define Vmax parms[51]
#define Km parms[52]

/* Forcing (Input) functions */
static double forc[1];

#define Cinh forc[0]

/*----- Initializers */
void initmod_inh (void (* odeparms)(int *, double *))
{
    int N=53;
    odeparms(&N, parms);
}

void initforc_inh (void (* odeforcs)(int *, double *))
{
    int N=1;
    odeforcs(&N, forc);
}

```



```

}

void getParms_inh (double *inParms, double *out, int *nout) {
/*----- Model scaling */

    int i;

    for (i = 0; i < *nout; i++) {
        parms[i] = inParms[i];
    }

/* Unit conversion, hours (*24), kg (*BW or *BW0.75 for allometric scaling)*/
    kgutabs = kgutabs * 24 ;
    Clmetabolism = Clmetabolismc * 24 * BW ;
    Qcardiac = Qcardiacc * 24 * pow ( BW , 0.75 ) ;
    Qgfr = Qgfrc * pow ( BW , 0.75 ) * 24 ;
    Qgut = Qcardiac * Qgutf ;
    Qkidney = Qcardiac * Qkidneyf ;
    Qliver = Qcardiac * Qliverf ;
    Qlung = Qcardiac * Qlungf ;
    Qrest = Qcardiac - ( Qgut + Qkidney + Qliver + Qlung ) ;
    Vart = Vartc * BW ;
    Vgut = Vgutc * BW ;
    Vkidney = Vkidneyc * BW ;
    Vliver = Vliverc * BW ;
    Vlung = Vlungc * BW ;
    Vrest = Vrestc * BW ;
    Vven = Vvenc * BW ;
    Qalv = Qalvc * 24 * pow ( BW , 0.75 ) ;
    kUrt = fmin ( kUrtc , Qalv /24/pow( BW , 0.75)) * pow( BW , 0.75 ) * 24 ;
    Vmuc = Vmucc * BW ;
    Vmax = vmax * 60 * 24 ;
    Km = km ;

    for (i = 0; i < *nout; i++) {
        out[i] = parms[i];
    }
}

/*----- Dynamics section */

void derivs_inh (int *neq, double *pdTime, double *y, double *ydot, double
*yout, int *ip)
{
    yout[ID_Cgut] = y[ID_Agut] / Vgut ;           //Calculate gut concentration
    yout[ID_Cliver] = y[ID_Aliver] / Vliver ;    //Calculate liver concentration
    yout[ID_Cven] = y[ID_Aven] / Vven ;          //Calculate venous concentration
    yout[ID_Clung] = y[ID_Alung] / Vlung ;       //Calculate lung concentration
    yout[ID_Cart] = y[ID_Aart] / Vart ;          //Calculate arterial concentration
    yout[ID_Crest] = y[ID_Arest] / Vrest ;       //Calculate "rest-of-body" concentration

```

```

yout[ID_Ckidney] = y[ID_Akidney] / Vkidney ;//Calculate kidney concentration

yout[ID_Cplasma] = y[ID_Aven] / Vven
                  / Rblood2plasma ;                               //Calculate plasma concentration

yout[ID_Aplasma] = y[ID_Aven]
                  / Rblood2plasma * ( 1 - hematocrit ) ;//Calculate amount in the plasma

yout[ID_Calv] = yout[ID_Cart] / Kblood2air ;//Calculate alveolar concentration

yout[ID_Cendexh] = ((Qalv * yout[ID_Calv])
                   + kUrt * ((yout[ID_Cmuc] / Kmuc2air)
                              - yout[ID_Calv] ) ) / Qalv ;       //Calculate end-exhaled breath concentration

yout[ID_Cmixexh] = 0.7 * yout[ID_Cendexh]
                  + 0.3 * Cinh ;                               //Calculate mix-exhaled breath concentration

yout[ID_Cmuc] = y[ID_Amuc] / Vmuc ;                             //Calculate mucosal/URT concentration

ydot[ID_Agutlumen] = - kgutabs
                    * y[ID_Agutlumen] ;                       // Rate of absorption from the gut lumen

ydot[ID_Agut] = kgutabs * y[ID_Agutlumen]
               + Qgut * ( yout[ID_Cart]
                          - yout[ID_Cgut] * Rblood2plasma
                          / Kgut2pu
                          / Fraction_unbound_plasma ) ;       //Gut rate

ydot[ID_Aliver] = Qliver * yout[ID_Cart]
                 + Qgut * yout[ID_Cgut] * Rblood2plasma
                 / Kgut2pu / Fraction_unbound_plasma
                 - ( Qliver + Qgut ) * yout[ID_Cliver]
                 / Kliver2pu / Fraction_unbound_plasma
                 * Rblood2plasma - Clmetabolism
                 * yout[ID_Cliver] / Kliver2pu
                 / Fraction_unbound_plasma
                 * Rblood2plasma - Vmax * yout[ID_Cliver]
                 / Kliver2pu / ( Km + yout[ID_Cliver]
                               / Kliver2pu ) ;                 //Liver rate

ydot[ID_Aven] = ( ( Qliver + Qgut )
                  * yout[ID_Cliver] / Kliver2pu
                  + Qkidney * yout[ID_Ckidney]
                  / Kkidney2pu + Qrest * yout[ID_Crest]
                  / Krest2pu + Qlung * yout[ID_Clung]
                  / Klung2pu ) * Rblood2plasma
                  / Fraction_unbound_plasma - Qcardiac
                  * yout[ID_Cven] ;                             //Venous rate

ydot[ID_Alung] = Qlung * ( yout[ID_Cart]
                          - yout[ID_Clung] * Rblood2plasma
                          / Klung2pu / Fraction_unbound_plasma ) ;//Lung tissue rate

ydot[ID_Aart] = ( Qcardiac * ( yout[ID_Cven]

```

```

- yout[ID_Cart] ) ) + ( Qalv * ( Cinh
- yout[ID_Calv] ) ) - ( kUrt * ( Cinh
- ( yout[ID_Cmuc] / Kmuc2air ) ) ) ; //Arterial rate

ydot[ID_Arest] = Qrest * ( yout[ID_Cart]
- yout[ID_Crest] * Rblood2plasma
/ Krest2pu / Fraction_unbound_plasma) ;//”Rest-of-body” rate

ydot[ID_Akidney] = Qkidney * yout[ID_Cart]
- Qkidney * yout[ID_Ckidney]
/ Kkidney2pu * Rblood2plasma
/ Fraction_unbound_plasma - Qgfr
* yout[ID_Ckidney] / Kkidney2pu ; //Kidney rate

ydot[ID_Atubules] = Qgfr * yout[ID_Ckidney]
/ Kkidney2pu ; //Kidney tubules rate

ydot[ID_Ametabolized] = Clmetabolism
* yout[ID_Cliver] / Kliver2pu
/ Fraction_unbound_plasma
* Rblood2plasma + Vmax * yout[ID_Cliver]
/ Kliver2pu / ( Km + yout[ID_Cliver]
/ Kliver2pu ) ; //Hepatic metabolism rate

ydot[ID_AUC] = yout[ID_Cven]/Rblood2plasma; //Area under the curve calc

ydot[ID_Ainh] = ( Qalv * ( yout[ID_Calv]
- Cinh ) ) + kUrt * ( ( yout[ID_Cmuc]
/ Kmuc2air ) - yout[ID_Calv] ) ; //Rate of chemical inhalation

ydot[ID_Aexh] = ( Qalv * yout[ID_Calv] )
+ kUrt * ( ( yout[ID_Cmuc] / Kmuc2air )
- yout[ID_Calv] ) ; //Rate of chemical exhalation

ydot[ID_Amuc] = ( kUrt * ( Cinh
- ( yout[ID_Cmuc] / Kmuc2air ) ) )
- ( kUrt * ( ( yout[ID_Cmuc]
/ Kmuc2air ) - yout[ID_Calv] ) ) ; //Mucosal/URT rate

} /* derivs */

/*----- Jacobian calculations: */
void jac_inh (int *neq, double *t, double *y, int *ml, int *mu, double *pd,
int *nrowpd, double *yout, int *ip)
{

} /* jac */

/*----- Events calculations: */
void event_inh (int *n, double *t, double *y)
{

} /* event */

```

```
/*----- Roots calculations: */  
void root_inh (int *neq, double *t, double *y, int *ng, double *gout, double  
*out, int *ip)  
{  
  
} /* root */
```

Corresponding Author Name: \_\_\_\_\_  
 Manuscript Number: \_\_\_\_\_

## Reporting Checklist

This checklist is used to ensure good reporting standards and to improve the reproducibility of published results. **Please respond completely to all questions relevant to your manuscript.** For more information, please read the journal's Guide to Authors.

Check here to confirm that the following information is available in the Material & Methods section:

- the **exact sample size (*n*)** for each experimental group/condition, given as a number, not a range;
- a **description of the sample collection** allowing the reader to understand whether the samples represent **technical or biological replicates** (including how many animals, litters, culture, etc.);
- a **statement of how many times the experiment shown was replicated in the laboratory**;
- **definitions of statistical methods and measures:** (For small sample sizes ( $n < 5$ ) descriptive statistics are not appropriate, instead plot individual data points)
  - very common tests, such as *t*-test, simple  $\chi^2$  tests, Wilcoxon and Mann-Whitney tests, can be unambiguously identified by name only, but more complex techniques should be described in the methods section;
  - are tests one-sided or two-sided?
  - are there adjustments for multiple comparisons?
  - **statistical test results**, e.g., ***P* values**;
  - definition of '**center values**' as **median or mean**;
  - definition of **error bars as s.d. or s.e.m. or c.i.**

Please ensure that the answers to the following questions are reported **in the manuscript itself**. We encourage you to include a specific subsection in the methods section for statistics, reagents and animal models. Below, provide the page number or section and paragraph number.

### Statistics and general methods

1. How was the sample size chosen to ensure adequate power to detect a pre-specified effect size? (Give section/paragraph or page #)

For animal studies, include a statement about sample size estimate even if no statistical methods were used.

2. Describe inclusion/exclusion criteria if samples or animals were excluded from the analysis. Were the criteria pre-established? (Give section/paragraph or page #)

3. If a method of randomization was used to determine how samples/animals were allocated to experimental groups and processed, describe it. (Give section/paragraph or page #)

For animal studies, include a statement about randomization even if no randomization was used.

### Reported in section/paragraph or page #

|  |  |
|--|--|
|  |  |
|  |  |
|  |  |
|  |  |
|  |  |

4. If the investigator was blinded to the group allocation during the experiment and/or when assessing the outcome, state the extent of blinding. (Give section/paragraph or page #)

|  |
|--|
|  |
|--|

For animal studies, include a statement about blinding even if no blinding was done.

|  |
|--|
|  |
|--|

5. For every figure, are statistical tests justified as appropriate?

|  |
|--|
|  |
|--|

Do the data meet the assumptions of the tests (e.g., normal distribution)?

|  |
|--|
|  |
|--|

Is there an estimate of variation within each group of data?

|  |
|--|
|  |
|--|

Is the variance similar between the groups that are being statistically compared? (Give section/paragraph or page #)

|  |
|--|
|  |
|--|

**Reagents**

**Reported in section/paragraph or page #**

6. Report the source of antibodies (vendor and catalog number)

|  |
|--|
|  |
|--|

7. Identify the source of cell lines and report if they were recently authenticated (e.g., by STR profiling) and tested for mycoplasma contamination

|  |
|--|
|  |
|--|

**Animal Models**

**Reported in section/paragraph or page #**

8. Report species, strain, sex and age of animals

|  |
|--|
|  |
|--|

9. For experiments involving live vertebrates, include a statement of compliance with ethical regulations and identify the committee(s) approving the experiments.

|  |
|--|
|  |
|--|

10. We recommend consulting the ARRIVE guidelines ([PLoS Biol. 8\(6\), e1000412,2010](https://doi.org/10.1371/journal.pbio.1000412)) to ensure that other relevant aspects of animal studies are adequately reported.

**Human subjects****Reported in section/paragraph or page #**

11. Identify the committee(s) approving the study protocol.

|  |
|--|
|  |
|--|

12. Include a statement confirming that informed consent was obtained from all subjects.

|  |
|--|
|  |
|--|

13. For publication of patient photos, include a statement confirming that consent to publish was obtained.

|  |
|--|
|  |
|--|

14. Report the clinical trial registration number (at [ClinicalTrials.gov](http://ClinicalTrials.gov) or equivalent).

|  |
|--|
|  |
|--|

15. For phase II and III randomized controlled trials, please refer to the [CONSORT statement](#) and submit the CONSORT checklist with your submission.

16. For tumor marker prognostic studies, we recommend that you follow the [REMARK reporting guidelines](#).

**Data deposition****Reported in section/paragraph or page #**

17. Provide accession codes for deposited data.

Data deposition in a public repository is mandatory for:

- a. Protein, DNA and RNA sequences
- b. Macromolecular structures
- c. Crystallographic data for small molecules
- d. Microarray data

|  |
|--|
|  |
|--|

Deposition is strongly recommended for many other datasets for which structured public repositories exist; more details on our data policy are available in the Guide to Authors. We encourage the provision of other source data in supplementary information or in unstructured repositories such as [Figshare](#) and [Dryad](#). We encourage publication of Data Descriptors (see [Scientific Data](#)) to maximize data reuse.

18. If computer code was used to generate results that are central to the paper's conclusions, include a statement in the Methods section under "**Code availability**" to indicate whether and how the code can be accessed. Include version information as necessary and any restrictions on availability.

|  |
|--|
|  |
|--|
